# Supplementary material for: Maternal hypertension-related genes affect the fetal growth via placenta
Source: Research Square preprint supplement (doi:10.21203/rs.3.rs-431082/v1), 2021-04-21
Supplement: Supplementary file 1 [file d368e82ada810c32498854c0.xlsx]

## Sheet: Table S1
Supplementary Table 1. Association between maternal and fetal SBP-increasing PGS and various phenotypes
Linear regression model: Phenotype ~ PGS for SBP
a. Maternal PGS
P-value threshold (number of SNPs in PGS)	1.0E-06 (n = 67)			1.0E-05 (n = 111)			1.0E-04 (n = 303)			1.0E-03 (n = 1095)
	Est.	95% CI	P value	Est.	95% CI	P value	Est.	95% CI	P value	Est.	95% CI	P value
SBP early gestation§	0.0312	[-0.177,0.239]	0.766	-0.0201	[-0.228,0.188]	0.849	0.068	[-0.14,0.276]	0.517	0.078	[-0.129,0.286]	0.455
SBP mid gestation§	0.0092	[-0.199,0.217]	0.93	-0.0201	[-0.228,0.188]	0.849	0.0952	[-0.112,0.303]	0.364	0.08	[-0.128,0.287]	0.447
SBP late gestation§	0.01	[-0.201,0.221]	0.925	0.038	[-0.175,0.251]	0.724	0.1423	[-0.066,0.35]	0.177	0.124	[-0.083,0.331]	0.238
Birth weight*	-0.3141	[-0.496,-0.133]	0.000883	-0.338	[-0.518,-0.159]	0.000321	-0.2995	[-0.482,-0.117]	0.00157	-0.211	[-0.399,-0.023]	0.0281
Placenta weight*	-0.3961	[-0.562,-0.23]	8.08e-06	-0.3941	[-0.561,-0.228]	9.04e-06	-0.4088	[-0.574,-0.244]	3.76e-06	-0.272	[-0.449,-0.095]	0.00294
Velocity at 20 weeks	-0.2275	[-0.438,-0.017]	0.0344	-0.1817	[-0.393,0.029]	0.0902	-0.0599	[-0.275,0.155]	0.58	0.08	[-0.303,0.131]	0.433
Velocity at 22 weeks	-0.1341	[-0.342,0.074]	0.203	-0.1125	[-0.321,0.096]	0.287	-0.0129	[-0.222,0.196]	0.902	0.124	[-0.288,0.13]	0.455
Velocity at 24 weeks	-0.0856	[-0.294,0.123]	0.417	-0.0839	[-0.293,0.125]	0.428	-0.0351	[-0.244,0.173]	0.738	-0.211	[-0.309,0.108]	0.34
Velocity at 26 weeks	-0.0124	[-0.221,0.196]	0.906	-0.038	[-0.246,0.17]	0.718	-0.0748	[-0.283,0.133]	0.476	-0.024	[-0.281,0.135]	0.488
Velocity at 28 weeks	0.0176	[-0.191,0.226]	0.867	-0.0223	[-0.231,0.186]	0.832	-0.0829	[-0.291,0.125]	0.429	-0.272	[-0.228,0.188]	0.848
Velocity at 30 weeks	-0.0404	[-0.249,0.168]	0.701	-0.079	[-0.287,0.129]	0.452	-0.0594	[-0.267,0.149]	0.572	0.184	[-0.152,0.264]	0.596
Velocity at 32 weeks	-0.2174	[-0.421,-0.014]	0.0363	-0.2433	[-0.445,-0.041]	0.0188	-0.1717	[-0.377,0.033]	0.0997	-0.086	[-0.24,0.176]	0.76
Velocity at 34 weeks	-0.326	[-0.525,-0.127]	0.00156	-0.3368	[-0.535,-0.139]	0.00106	-0.2736	[-0.475,-0.072]	0.00831	-0.101	[-0.361,0.052]	0.14
Velocity at 36 weeks	-0.3793	[-0.576,-0.182]	0.000242	-0.3669	[-0.564,-0.17]	0.00036	-0.3519	[-0.55,-0.154]	0.000641	-0.073	[-0.472,-0.067]	0.00981
b. Fetal PGS
P-value threshold (number of SNPs in PGS)	1.0E-06 (n = 67)			1.0E-05 (n = 111)			1.0E-04 (n = 303)			1.0E-03 (n = 1095)
	Est.	95% CI	P value	Est.	95% CI	P value	Est.	95% CI	P value	Est.	95% CI	P value
SBP early gestation§	0.1067	[-0.1,0.314]	0.309	0.0448	[-0.163,0.253]	0.67	0.0487	[-0.159,0.257]	0.643	-0.0659	[-0.274,0.142]	0.53
SBP mid gestation§	0.1032	[-0.104,0.31]	0.325	0.0165	[-0.192,0.225]	0.875	0.1129	[-0.094,0.32]	0.281	-0.014	[-0.222,0.194]	0.894
SBP late gestation§	0.1717	[-0.036,0.38]	0.105	0.1182	[-0.089,0.326]	0.261	0.1676	[-0.039,0.374]	0.11	0.0457	[-0.166,0.257]	0.668
Birth weight*	-0.1204	[-0.312,0.071]	0.214	-0.1495	[-0.34,0.041]	0.122	-0.1397	[-0.33,0.051]	0.149	-0.0836	[-0.276,0.109]	0.39
Placenta weight*	-0.2737	[-0.45,-0.097]	0.00274	-0.2694	[-0.446,-0.093]	0.00323	-0.2688	[-0.446,-0.092]	0.0033	-0.1887	[-0.37,-0.007]	0.0416
Velocity at 20 weeks	-0.0513	[-0.267,0.165]	0.638	0.026	[-0.188,0.24]	0.809	0.1228	[-0.088,0.333]	0.249	0.0777	[-0.14,0.296]	0.48
Velocity at 22 weeks	0.0489	[-0.16,0.258]	0.643	0.1002	[-0.107,0.307]	0.339	0.1553	[-0.051,0.361]	0.137	0.0689	[-0.143,0.281]	0.521
Velocity at 24 weeks	0.0946	[-0.113,0.303]	0.368	0.1289	[-0.078,0.336]	0.218	0.1331	[-0.073,0.34]	0.203	0.0334	[-0.179,0.246]	0.756
Velocity at 26 weeks	0.0622	[-0.146,0.27]	0.554	0.0934	[-0.114,0.301]	0.373	0.0412	[-0.167,0.249]	0.695	-0.0154	[-0.224,0.193]	0.884
Velocity at 28 weeks	-0.0174	[-0.226,0.191]	0.869	0.0021	[-0.206,0.21]	0.984	-0.0218	[-0.23,0.186]	0.836	-0.027	[-0.235,0.181]	0.798
Velocity at 30 weeks	-0.1041	[-0.311,0.103]	0.321	-0.1043	[-0.311,0.103]	0.32	-0.0652	[-0.273,0.143]	0.535	-0.0382	[-0.246,0.17]	0.716
Velocity at 32 weeks	-0.2077	[-0.411,-0.004]	0.0458	-0.1898	[-0.394,0.015]	0.0685	-0.1332	[-0.34,0.073]	0.203	-0.1216	[-0.328,0.085]	0.246
Velocity at 34 weeks	-0.2176	[-0.422,-0.013]	0.0374	-0.2174	[-0.421,-0.014]	0.0368	-0.188	[-0.393,0.017]	0.072	-0.1633	[-0.371,0.044]	0.121
Velocity at 36 weeks	-0.1336	[-0.341,0.074]	0.205	-0.1597	[-0.367,0.047]	0.129	-0.1501	[-0.357,0.057]	0.153	-0.064	[-0.274,0.146]	0.546
P value below the Bonferroni corrected threshold (P = 4.46E-4) for 112 tests is shown in bold.
SBP, systolic blood pressure; Est., estimated regression coefficients; CI, confidence interval; Velocity, fetal growth velocity = weekly change of estimated fetal weight
All phenotype variables are normalized
§Early gestation denotes gestational week < 20; mid gestation, 20 ≤ gestational week < 34; late gestation, 34 ≤ gestational week
*adjusted for gestational age, fetal sex and parity and normlized

## Sheet: Table S2
Supplementary Table 2. Association between maternal or fetal DBP-increasing PGS and various phenotypes
Linear regression model: Phenotype ~ polygenic score
a. Maternal PGS
P-value threshold (number of SNPs in PGS)	p < 1.0E-06 (n = 44 )			p < 1.0E-05 (n = 87 )			p < 1.0E-04 (n = 258 )			p < 1.0E-03 (n = 989 )
	Est.	95% CI	P value	Est.	95% CI	P value	Est.	95% CI	P value	Est.	95% CI	P value
DBP early gestation§	0.0648	[-0.143,0.273]	0.537	0.0441	[-0.164,0.252]	0.675	0.1375	[-0.069,0.344]	0.189	0.1612	[-0.044,0.367]	0.123
DBP mid gestation§	0.1345	[-0.072,0.341]	0.199	0.1133	[-0.094,0.32]	0.28	0.2404	[0.038,0.443]	0.0203	0.1927	[-0.012,0.397]	0.0642
DBP late gestation§	0.1544	[-0.052,0.361]	0.14	0.1301	[-0.077,0.337]	0.215	0.2613	[0.059,0.464]	0.0119	0.2372	[0.033,0.442]	0.0237
Birth weight*	-0.2226	[-0.41,-0.035]	0.0203	-0.2045	[-0.393,-0.016]	0.0334	-0.0809	[-0.273,0.111]	0.405	-0.127	[-0.318,0.064]	0.19
Placenta weight*	-0.2691	[-0.446,-0.092]	0.00326	-0.2585	[-0.436,-0.081]	0.00479	-0.1495	[-0.332,0.033]	0.108	-0.039	[-0.224,0.146]	0.677
Velocity at 20 weeks	-0.1338	[-0.352,0.084]	0.226	-0.0857	[-0.3,0.129]	0.429	-0.0453	[-0.265,0.175]	0.683	0.0387	[-0.176,0.254]	0.721
Velocity at 22 weeks	-0.0578	[-0.267,0.151]	0.584	-0.0459	[-0.255,0.163]	0.663	-0.014	[-0.223,0.195]	0.895	0.1007	[-0.107,0.308]	0.337
Velocity at 24 weeks	-0.0293	[-0.239,0.18]	0.782	-0.0381	[-0.247,0.171]	0.718	0.0086	[-0.2,0.218]	0.935	0.1323	[-0.074,0.339]	0.206
Velocity at 26 weeks	-0.0136	[-0.222,0.195]	0.897	-0.0485	[-0.257,0.16]	0.644	0.0282	[-0.18,0.236]	0.788	0.098	[-0.109,0.305]	0.35
Velocity at 28 weeks	-0.0673	[-0.275,0.141]	0.522	-0.0844	[-0.292,0.123]	0.421	0.0172	[-0.191,0.225]	0.87	0.0336	[-0.175,0.242]	0.749
Velocity at 30 weeks	-0.1398	[-0.346,0.066]	0.181	-0.1414	[-0.348,0.065]	0.176	-0.0445	[-0.253,0.164]	0.672	0.0094	[-0.199,0.218]	0.928
Velocity at 32 weeks	-0.2089	[-0.413,-0.005]	0.0444	-0.2146	[-0.418,-0.011]	0.0389	-0.1007	[-0.308,0.106]	0.337	-0.0034	[-0.212,0.205]	0.974
Velocity at 34 weeks	-0.2662	[-0.467,-0.066]	0.0099	-0.2587	[-0.46,-0.058]	0.0123	-0.103	[-0.311,0.105]	0.327	-0.1148	[-0.322,0.093]	0.275
Velocity at 36 weeks	-0.2862	[-0.487,-0.085]	0.00578	-0.2496	[-0.454,-0.045]	0.0175	-0.1122	[-0.322,0.097]	0.29	-0.2424	[-0.446,-0.039]	0.0204
b. Fetal PGS
P-value threshold (number of SNPs in PGS)	p < 1.0E-06 (n = 44 )			p < 1.0E-05 (n = 87 )			p < 1.0E-04 (n = 258 )			p < 1.0E-03 (n = 989 )
	Est.	95% CI	P value	Est.	95% CI	P value	Est.	95% CI	P value	Est.	95% CI	P value
DBP early gestation§	-0.0023	[-0.211,0.206]	0.982	-0.061	[-0.269,0.147]	0.562	-0.0156	[-0.224,0.193]	0.882	-0.0234	[-0.232,0.185]	0.824
DBP mid gestation§	0.0849	[-0.123,0.292]	0.418	-0.004	[-0.212,0.204]	0.969	0.1243	[-0.082,0.331]	0.235	0.0709	[-0.137,0.279]	0.5
DBP late gestation§	0.1088	[-0.102,0.32]	0.308	0.0832	[-0.126,0.292]	0.431	0.1999	[-0.006,0.406]	0.0567	0.103	[-0.107,0.312]	0.331
Birth weight*	-0.0451	[-0.238,0.148]	0.643	-0.1527	[-0.343,0.038]	0.114	-0.1083	[-0.3,0.083]	0.264	-0.0946	[-0.286,0.097]	0.33
Placenta weight*	-0.1754	[-0.357,0.007]	0.0587	-0.2298	[-0.409,-0.051]	0.0126	-0.2285	[-0.408,-0.049]	0.0131	-0.1855	[-0.367,-0.004]	0.0452
Velocity at 20 weeks	-0.0275	[-0.246,0.191]	0.803	-0.0385	[-0.253,0.176]	0.722	-0.069	[-0.283,0.145]	0.523	-0.0264	[-0.237,0.184]	0.803
Velocity at 22 weeks	0.0391	[-0.171,0.249]	0.712	0.0467	[-0.162,0.255]	0.657	0.0221	[-0.187,0.231]	0.834	0.0513	[-0.157,0.259]	0.625
Velocity at 24 weeks	0.0711	[-0.138,0.281]	0.502	0.0782	[-0.13,0.286]	0.457	0.055	[-0.154,0.264]	0.602	0.116	[-0.091,0.323]	0.268
Velocity at 26 weeks	0.0134	[-0.195,0.222]	0.898	0.0192	[-0.189,0.227]	0.855	0.0463	[-0.162,0.254]	0.66	0.1286	[-0.078,0.335]	0.219
Velocity at 28 weeks	-0.0472	[-0.255,0.161]	0.653	-0.0714	[-0.279,0.136]	0.497	0.0035	[-0.205,0.212]	0.974	0.0685	[-0.139,0.276]	0.514
Velocity at 30 weeks	-0.0854	[-0.293,0.122]	0.415	-0.1519	[-0.358,0.054]	0.146	-0.09	[-0.297,0.117]	0.391	-0.0091	[-0.217,0.199]	0.931
Velocity at 32 weeks	-0.1161	[-0.323,0.091]	0.268	-0.1959	[-0.4,0.008]	0.0598	-0.1349	[-0.341,0.072]	0.197	-0.0606	[-0.268,0.147]	0.564
Velocity at 34 weeks	-0.1274	[-0.334,0.08]	0.224	-0.2066	[-0.412,-0.002]	0.0481	-0.1108	[-0.318,0.097]	0.291	-0.1373	[-0.344,0.07]	0.191
Velocity at 36 weeks	-0.0656	[-0.274,0.143]	0.534	-0.1635	[-0.37,0.043]	0.12	-0.0661	[-0.274,0.142]	0.53	-0.1557	[-0.362,0.051]	0.137
P value below the Bonferroni corrected threshold (P = 4.46E-4) for 112 tests is shown in bold.
DBP, diastolic blood pressure; Est., estimated regression coefficients; CI, confidence interval; Velocity, fetal growth velocity = weekly change of estimated fetal weight
All phenotype variables are normalized
§Early gestation denotes gestational week < 20; mid gestation, 20 ≤ gestational week < 34; late gestation, 34 ≤ gestational week
*adjusted for gestational age, fetal sex and parity and normlized

## Sheet: Table S3
Supplementary Table 3. Association between maternal or fetal MAP-increasing PGS and various phenotypes
Linear regression model: Phenotype ~ polygenic score
a. Maternal PGS
P-value threshold (number of SNPs in PGS)	p < 1.0E-06 (n = 62 )			p < 1.0E-05 (n = 115 )			p < 1.0E-04 (n = 314 )			p < 1.0E-03 (n = 1098 )
	Est.	95% CI	P value	Est.	95% CI	P value	Est.	95% CI	P value	Est.	95% CI	P value
MAP early gestation§	0.0836	[-0.124,0.291]	0.425	0.1204	[-0.086,0.327]	0.25	0.0577	[-0.15,0.266]	0.583	0.0991	[-0.108,0.306]	0.344
MAP mid gestation§	0.1002	[-0.107,0.307]	0.339	0.1136	[-0.093,0.321]	0.278	0.1517	[-0.054,0.358]	0.147	0.1487	[-0.057,0.355]	0.155
MAP late gestation§	0.0817	[-0.126,0.29]	0.437	0.1584	[-0.049,0.366]	0.133	0.2137	[0.009,0.418]	0.0408	0.1973	[-0.008,0.402]	0.0588
Birth weight*	-0.2519	[-0.438,-0.066]	0.00834	-0.2506	[-0.436,-0.065]	0.0087	-0.15	[-0.34,0.04]	0.121	-0.1241	[-0.315,0.067]	0.2
Placenta weight*	-0.3261	[-0.499,-0.153]	0.000309	-0.332	[-0.504,-0.16]	0.000236	-0.2215	[-0.401,-0.042]	0.0163	-0.1263	[-0.31,0.057]	0.176
Velocity at 20 weeks	-0.0929	[-0.303,0.117]	0.381	-0.0925	[-0.304,0.119]	0.387	-0.0645	[-0.281,0.152]	0.555	0.0139	[-0.202,0.23]	0.899
Velocity at 22 weeks	-0.0962	[-0.304,0.111]	0.359	-0.0359	[-0.244,0.172]	0.732	0.0165	[-0.194,0.227]	0.876	0.0959	[-0.112,0.304]	0.363
Velocity at 24 weeks	-0.0956	[-0.303,0.112]	0.362	-0.0343	[-0.243,0.174]	0.744	0.0534	[-0.156,0.263]	0.614	0.102	[-0.106,0.31]	0.333
Velocity at 26 weeks	-0.0645	[-0.272,0.143]	0.539	-0.0569	[-0.265,0.151]	0.588	0.0478	[-0.16,0.256]	0.649	0.086	[-0.121,0.294]	0.412
Velocity at 28 weeks	-0.0647	[-0.273,0.143]	0.538	-0.0939	[-0.301,0.113]	0.371	0.0306	[-0.178,0.239]	0.771	0.0857	[-0.122,0.293]	0.414
Velocity at 30 weeks	-0.1241	[-0.331,0.083]	0.236	-0.1425	[-0.349,0.064]	0.173	0.0262	[-0.182,0.234]	0.803	0.0987	[-0.109,0.306]	0.347
Velocity at 32 weeks	-0.2417	[-0.444,-0.04]	0.0196	-0.2446	[-0.447,-0.043]	0.0181	-0.0695	[-0.277,0.138]	0.508	0.0362	[-0.172,0.244]	0.731
Velocity at 34 weeks	-0.2816	[-0.482,-0.082]	0.00632	-0.2838	[-0.484,-0.084]	0.00599	-0.1305	[-0.337,0.076]	0.212	-0.0622	[-0.27,0.146]	0.554
Velocity at 36 weeks	-0.2589	[-0.462,-0.056]	0.0132	-0.2848	[-0.489,-0.08]	0.00685	-0.1875	[-0.396,0.021]	0.0768	-0.224	[-0.43,-0.018]	0.0333
b. Fetal PGS
P-value threshold (number of SNPs in PGS)	p < 1.0E-06 (n = 62 )			p < 1.0E-05 (n = 115 )			p < 1.0E-04 (n = 314 )			p < 1.0E-03 (n = 1098 )
	Est.	95% CI	P value	Est.	95% CI	P value	Est.	95% CI	P value	Est.	95% CI	P value
MAP early gestation§	0.0404	[-0.168,0.249]	0.7	0.0112	[-0.197,0.219]	0.915	-0.0136	[-0.222,0.195]	0.897	0.0525	[-0.156,0.26]	0.617
MAP mid gestation§	0.0673	[-0.141,0.275]	0.522	-0.0082	[-0.217,0.2]	0.937	0.0595	[-0.148,0.267]	0.571	0.0806	[-0.127,0.288]	0.442
MAP late gestation§	0.106	[-0.103,0.315]	0.316	0.1063	[-0.102,0.315]	0.313	0.1517	[-0.055,0.358]	0.148	0.0801	[-0.129,0.289]	0.449
Birth weight*	-0.1767	[-0.366,0.013]	0.067	-0.1946	[-0.383,-0.006]	0.0432	-0.1183	[-0.31,0.073]	0.222	-0.0633	[-0.256,0.129]	0.515
Placenta weight*	-0.2827	[-0.459,-0.107]	0.00194	-0.2894	[-0.465,-0.114]	0.00149	-0.2211	[-0.401,-0.041]	0.0165	-0.1613	[-0.344,0.021]	0.0825
Velocity at 20 weeks	0.0005	[-0.215,0.216]	0.996	0.0222	[-0.193,0.237]	0.838	0.051	[-0.16,0.262]	0.631	0.0297	[-0.182,0.242]	0.781
Velocity at 22 weeks	0.0335	[-0.177,0.244]	0.753	0.0973	[-0.111,0.305]	0.355	0.1498	[-0.056,0.356]	0.152	0.1058	[-0.102,0.313]	0.313
Velocity at 24 weeks	0.0271	[-0.183,0.237]	0.798	0.0965	[-0.111,0.305]	0.359	0.1739	[-0.031,0.379]	0.0957	0.156	[-0.05,0.362]	0.136
Velocity at 26 weeks	-0.0631	[-0.271,0.145]	0.548	0.0046	[-0.204,0.213]	0.965	0.0886	[-0.119,0.296]	0.398	0.1207	[-0.086,0.327]	0.249
Velocity at 28 weeks	-0.1331	[-0.34,0.073]	0.203	-0.077	[-0.285,0.131]	0.463	0.0131	[-0.195,0.221]	0.901	0.0489	[-0.159,0.257]	0.642
Velocity at 30 weeks	-0.2004	[-0.404,0.004]	0.0541	-0.173	[-0.378,0.032]	0.0973	-0.0568	[-0.265,0.151]	0.589	-0.0286	[-0.237,0.18]	0.786
Velocity at 32 weeks	-0.2363	[-0.439,-0.034]	0.0226	-0.2291	[-0.432,-0.026]	0.0272	-0.1174	[-0.324,0.089]	0.263	-0.091	[-0.298,0.116]	0.386
Velocity at 34 weeks	-0.2302	[-0.434,-0.027]	0.027	-0.2352	[-0.439,-0.032]	0.0238	-0.1465	[-0.353,0.06]	0.162	-0.1295	[-0.338,0.078]	0.219
Velocity at 36 weeks	-0.1506	[-0.357,0.056]	0.151	-0.1942	[-0.399,0.011]	0.0633	-0.1199	[-0.328,0.088]	0.254	-0.1037	[-0.313,0.105]	0.326
P value below the Bonferroni corrected threshold (P = 4.46E-4) for 112 tests is shown in bold.
MAP, mean arterial pressure; Est., estimated regression coefficients; CI, confidence interval; Velocity, fetal growth velocity = weekly change of estimated fetal weight
All phenotype variables are normalized
§Early gestation denotes gestational week < 20; mid gestation, 20 ≤ gestational week < 34; late gestation, 34 ≤ gestational week
*adjusted for gestational age, fetal sex and parity and normlized

## Sheet: Table S4
Supplementary Table 4. Association between maternal or fetal PP-increasing PGS and various phenotypes
Linear regression model: Phenotype ~ polygenic score
a. Maternal PGS
P-value threshold (number of SNPs in PGS)	p < 1.0E-06 (n = 29 )			p < 1.0E-05 (n = 57 )			p < 1.0E-04 (n = 185 )			p < 1.0E-03 (n = 859 )
	Est.	95% CI	P value	Est.	95% CI	P value	Est.	95% CI	P value	Est.	95% CI	P value
PP early gestation§	0.1304	[-0.076,0.337]	0.213	0.0768	[-0.131,0.285]	0.464	0.0203	[-0.188,0.229]	0.847	0.0569	[-0.151,0.265]	0.588
PP mid gestation§	0.041	[-0.167,0.249]	0.697	-0.0357	[-0.244,0.172]	0.734	-0.0258	[-0.234,0.182]	0.806	0.0546	[-0.153,0.263]	0.603
PP late gestation§	-0.1006	[-0.309,0.108]	0.341	-0.1656	[-0.373,0.042]	0.117	-0.1023	[-0.311,0.106]	0.332	0.046	[-0.163,0.255]	0.663
Birth weight*	-0.2866	[-0.47,-0.103]	0.00254	-0.2534	[-0.439,-0.068]	0.00797	-0.2078	[-0.396,-0.02]	0.0306	-0.2455	[-0.432,-0.06]	0.0102
Placenta weight*	-0.3398	[-0.511,-0.168]	0.000163	-0.3686	[-0.538,-0.2]	3.77e-05	-0.3659	[-0.535,-0.197]	4.35e-05	-0.3202	[-0.493,-0.147]	0.000404
Velocity at 20 weeks	-0.0796	[-0.303,0.144]	0.481	-0.084	[-0.308,0.14]	0.457	0.0026	[-0.228,0.233]	0.982	-0.1479	[-0.366,0.071]	0.182
Velocity at 22 weeks	-0.0808	[-0.289,0.127]	0.443	-0.0585	[-0.267,0.15]	0.578	0.0243	[-0.185,0.234]	0.818	-0.146	[-0.352,0.06]	0.163
Velocity at 24 weeks	-0.1501	[-0.357,0.056]	0.152	-0.112	[-0.319,0.095]	0.286	-0.0192	[-0.229,0.19]	0.856	-0.2295	[-0.433,-0.027]	0.0272
Velocity at 26 weeks	-0.1302	[-0.337,0.076]	0.214	-0.0939	[-0.301,0.113]	0.371	-0.0801	[-0.288,0.127]	0.445	-0.2701	[-0.471,-0.07]	0.00884
Velocity at 28 weeks	-0.0664	[-0.274,0.141]	0.527	-0.0295	[-0.238,0.179]	0.779	-0.0817	[-0.289,0.126]	0.436	-0.2258	[-0.429,-0.023]	0.0295
Velocity at 30 weeks	-0.0698	[-0.278,0.138]	0.506	-0.0349	[-0.243,0.173]	0.74	-0.0807	[-0.288,0.127]	0.442	-0.1514	[-0.357,0.054]	0.147
Velocity at 32 weeks	-0.1817	[-0.387,0.023]	0.0813	-0.1449	[-0.351,0.061]	0.166	-0.1829	[-0.388,0.022]	0.0793	-0.2096	[-0.413,-0.006]	0.0437
Velocity at 34 weeks	-0.2392	[-0.443,-0.036]	0.0219	-0.1871	[-0.394,0.02]	0.0753	-0.2239	[-0.428,-0.02]	0.0317	-0.2303	[-0.434,-0.027]	0.027
Velocity at 36 weeks	-0.3059	[-0.506,-0.106]	0.00308	-0.2332	[-0.438,-0.029]	0.026	-0.1913	[-0.398,0.015]	0.0691	-0.181	[-0.388,0.026]	0.0855
b. Fetal PGS
P-value threshold (number of SNPs in PGS)	p < 1.0E-06 (n = 29 )			p < 1.0E-05 (n = 57 )			p < 1.0E-04 (n = 185 )			p < 1.0E-03 (n = 859 )
	Est.	95% CI	P value	Est.	95% CI	P value	Est.	95% CI	P value	Est.	95% CI	P value
PP early gestation§	0.1986	[-0.005,0.403]	0.0563	0.0637	[-0.144,0.272]	0.544	0.0798	[-0.128,0.287]	0.447	0.1643	[-0.041,0.37]	0.116
PP mid gestation§	0.1678	[-0.038,0.373]	0.108	0.077	[-0.131,0.285]	0.463	0.1166	[-0.09,0.323]	0.266	0.091	[-0.116,0.298]	0.386
PP late gestation§	0.1324	[-0.076,0.341]	0.21	0.0911	[-0.12,0.302]	0.393	0.2035	[-0.005,0.412]	0.0552	0.1758	[-0.032,0.384]	0.096
Birth weight*	-0.0674	[-0.26,0.125]	0.488	0.0046	[-0.188,0.198]	0.962	0.023	[-0.17,0.216]	0.813	-0.0668	[-0.259,0.126]	0.492
Placenta weight*	-0.1962	[-0.377,-0.015]	0.034	-0.1728	[-0.355,0.009]	0.0626	-0.2014	[-0.382,-0.021]	0.0294	-0.2294	[-0.409,-0.05]	0.0127
Velocity at 20 weeks	-0.1003	[-0.313,0.113]	0.351	-0.0529	[-0.265,0.159]	0.622	0.0886	[-0.125,0.302]	0.411	-0.07	[-0.287,0.147]	0.523
Velocity at 22 weeks	-0.08	[-0.288,0.128]	0.447	-0.0742	[-0.282,0.134]	0.481	0.0394	[-0.169,0.248]	0.708	-0.0789	[-0.287,0.129]	0.454
Velocity at 24 weeks	-0.1182	[-0.325,0.089]	0.26	-0.1078	[-0.315,0.1]	0.305	0.0001	[-0.208,0.208]	0.999	-0.1529	[-0.359,0.054]	0.145
Velocity at 26 weeks	-0.122	[-0.329,0.085]	0.244	-0.112	[-0.319,0.095]	0.285	-0.0844	[-0.292,0.123]	0.421	-0.1791	[-0.384,0.026]	0.0859
Velocity at 28 weeks	-0.1018	[-0.309,0.105]	0.332	-0.0938	[-0.301,0.114]	0.371	-0.114	[-0.321,0.093]	0.276	-0.1669	[-0.372,0.038]	0.11
Velocity at 30 weeks	-0.0475	[-0.256,0.161]	0.651	-0.0357	[-0.244,0.172]	0.734	-0.0573	[-0.265,0.151]	0.585	-0.1412	[-0.347,0.065]	0.177
Velocity at 32 weeks	-0.0954	[-0.303,0.112]	0.363	-0.0281	[-0.236,0.18]	0.79	-0.0941	[-0.301,0.113]	0.369	-0.1992	[-0.403,0.005]	0.0556
Velocity at 34 weeks	-0.0948	[-0.302,0.113]	0.367	0.0307	[-0.178,0.239]	0.77	-0.0479	[-0.256,0.16]	0.649	-0.1448	[-0.351,0.061]	0.166
Velocity at 36 weeks	-0.1012	[-0.309,0.106]	0.335	0.0157	[-0.193,0.225]	0.882	0.0228	[-0.186,0.232]	0.829	-0.069	[-0.277,0.139]	0.511
P value below the Bonferroni corrected threshold (P = 4.46E-4) for 112 tests is shown in bold.
PP, pulse pressure; Est., estimated regression coefficients; CI, confidence interval; Velocity, fetal growth velocity = weekly change of estimated fetal weight
All phenotype variables are normalized
§Early gestation denotes gestational week < 20; mid gestation, 20 ≤ gestational week < 34; late gestation, 34 ≤ gestational week
*adjusted for gestational age, fetal sex and parity and normlized

## Sheet: Table S5
Supplementary Table 5. Evaluation of the models for relationship between birth weight and maternal observational SBP
Gestational period	Parameters for the evaluation	Linear model	Quadratic model
SBP during the gestational period < 20 weeks	Adjusted R-squared	0.007873	0.01175
	P-value	0.003044	0.0011
	Global Stat of Global Test of Model Assumptions	Assumptions acceptable.	Assumptions acceptable.
	Skewness of Global Test of Model Assumptions	Assumptions acceptable.	Assumptions acceptable.
	Kurtosis of Global Test of Model Assumptions	Assumptions acceptable.	Assumptions acceptable.
	Link Function of Global Test of Model Assumptions	Assumptions NOT satisfied!	Assumptions acceptable.
	Heteroscedasticity of Global Test of Model Assumptions	Assumptions acceptable.	Assumptions acceptable.
	AIC	2725.5	2722.64
SBP during the gestational period ≥ 20 weeks and < 34 weeks	Adjusted R-squared	0.008095	0.01656
	P-value	0.002639	9.53e-05
	Global Stat of Global Test of Model Assumptions	Assumptions NOT satisfied!	Assumptions acceptable.
	Skewness of Global Test of Model Assumptions	Assumptions acceptable.	Assumptions acceptable.
	Kurtosis of Global Test of Model Assumptions	Assumptions acceptable.	Assumptions acceptable.
	Link Function of Global Test of Model Assumptions	Assumptions NOT satisfied!	Assumptions acceptable.
	Heteroscedasticity of Global Test of Model Assumptions	Assumptions acceptable.	Assumptions acceptable.
	AIC	2738.64	2731.14
SBP during the gestational period ≥ 34 weeks	Adjusted R-squared	-0.001019	0.005801
	P-value	0.8702	0.02295
	Global Stat of Global Test of Model Assumptions	Assumptions NOT satisfied!	Assumptions acceptable.
	Skewness of Global Test of Model Assumptions	Assumptions acceptable.	Assumptions acceptable.
	Kurtosis of Global Test of Model Assumptions	Assumptions acceptable.	Assumptions acceptable.
	Link Function of Global Test of Model Assumptions	Assumptions NOT satisfied!	Assumptions acceptable.
	Heteroscedasticity of Global Test of Model Assumptions	Assumptions acceptable.	Assumptions acceptable.
	AIC	2636.15	2630.61
SBP, systolic blood pressure; AIC, Akaike information criterion
Birth weight (outcome) is adjusted for adjusted for gestational age, fetal sex and parity

## Sheet: Table S6
Supplementary Table 6. Evaluation of the models for relationship between birth weight and maternal observational DBP
Gestational period	Parameters for the evaluation	Linear model	Quadratic model
DBP during the gestational period < 20 weeks	Adjusted R-squared	-0.0009345	0.002471
	P-value	0.7781	0.109
	Global Stat of Global Test of Model Assumptions	Assumptions acceptable.	Assumptions acceptable.
	Skewness of Global Test of Model Assumptions	Assumptions acceptable.	Assumptions acceptable.
	Kurtosis of Global Test of Model Assumptions	Assumptions acceptable.	Assumptions acceptable.
	Link Function of Global Test of Model Assumptions	Assumptions NOT satisfied!	Assumptions acceptable.
	Heteroscedasticity of Global Test of Model Assumptions	Assumptions acceptable.	Assumptions acceptable.
	AIC	2734.22	2731.86
DBP during the gestational period ≥ 20 weeks and < 34 weeks	Adjusted R-squared	-0.001004	0.01641
	P-value	0.9386	0.0001029
	Global Stat of Global Test of Model Assumptions	Assumptions NOT satisfied!	Assumptions acceptable.
	Skewness of Global Test of Model Assumptions	Assumptions acceptable.	Assumptions acceptable.
	Kurtosis of Global Test of Model Assumptions	Assumptions acceptable.	Assumptions acceptable.
	Link Function of Global Test of Model Assumptions	Assumptions NOT satisfied!	Assumptions acceptable.
	Heteroscedasticity of Global Test of Model Assumptions	Assumptions acceptable.	Assumptions acceptable.
	AIC	2747.7	2731.29
DBP during the gestational period ≥ 34 weeks	Adjusted R-squared	0.003303	0.01069
	P-value	0.04147	0.00219
	Global Stat of Global Test of Model Assumptions	Assumptions NOT satisfied!	Assumptions acceptable.
	Skewness of Global Test of Model Assumptions	Assumptions acceptable.	Assumptions acceptable.
	Kurtosis of Global Test of Model Assumptions	Assumptions acceptable.	Assumptions acceptable.
	Link Function of Global Test of Model Assumptions	Assumptions NOT satisfied!	Assumptions acceptable.
	Heteroscedasticity of Global Test of Model Assumptions	Assumptions acceptable.	Assumptions acceptable.
	AIC	2632.01	2625.89
DBP, diastolic blood pressure; AIC, Akaike information criterion
Birth weight (outcome) is adjusted for adjusted for gestational age, fetal sex and parity

## Sheet: Table S7
Supplementary Table 7. Evaluation of the models for relationship between birth weight and maternal observational MAP
Gestational period	Parameters for evaluation	Linear model	Quadratic model
MAP during the gestational period < 20 weeks	Adjusted R-squared	0.00104	0.007192
	P-value	0.1549	0.01056
	Global Stat of Global Test of Model Assumptions	Assumptions acceptable.	Assumptions acceptable.
	Skewness of Global Test of Model Assumptions	Assumptions acceptable.	Assumptions acceptable.
	Kurtosis of Global Test of Model Assumptions	Assumptions acceptable.	Assumptions acceptable.
	Link Function of Global Test of Model Assumptions	Assumptions NOT satisfied!	Assumptions acceptable.
	Heteroscedasticity of Global Test of Model Assumptions	Assumptions acceptable.	Assumptions acceptable.
	AIC	2732.27	2727.17
MAP during the gestational period ≥ 20 weeks and < 34 weeks	Adjusted R-squared	0.000656	0.01811
	P-value	0.1992	4.372e-05
	Global Stat of Global Test of Model Assumptions	Assumptions NOT satisfied!	Assumptions acceptable.
	Skewness of Global Test of Model Assumptions	Assumptions acceptable.	Assumptions acceptable.
	Kurtosis of Global Test of Model Assumptions	Assumptions acceptable.	Assumptions acceptable.
	Link Function of Global Test of Model Assumptions	Assumptions NOT satisfied!	Assumptions acceptable.
	Heteroscedasticity of Global Test of Model Assumptions	Assumptions acceptable.	Assumptions acceptable.
	AIC	2746.06	2729.57
MAP during the gestational period ≥ 34 weeks	Adjusted R-squared	0.001855	0.0114
	P-value	0.1832	0.001555
	Global Stat of Global Test of Model Assumptions	Assumptions NOT satisfied!	Assumptions acceptable.
	Skewness of Global Test of Model Assumptions	Assumptions acceptable.	Assumptions acceptable.
	Kurtosis of Global Test of Model Assumptions	Assumptions acceptable.	Assumptions acceptable.
	Link Function of Global Test of Model Assumptions	Assumptions NOT satisfied!	Assumptions acceptable.
	Heteroscedasticity of Global Test of Model Assumptions	Assumptions acceptable.	Assumptions acceptable.
	AIC	2634.4	2625.21
MAP, mean arterial pressure; AIC, Akaike information criterion
Birth weight (outcome) is adjusted for adjusted for gestational age, fetal sex and parity

## Sheet: Table S8
Supplementary Table 8. Evaluation of the models for relationship between birth weight and maternal observational PP
Gestational period	Parameters for evaluation	Linear model	Quadratic model
PP during the gestational period < 20 weeks	Adjusted R-squared	0.01309	0.01227
	P-value	0.0001857	0.0008463
	Global Stat of Global Test of Model Assumptions	Assumptions acceptable.	Assumptions acceptable.
	Skewness of Global Test of Model Assumptions	Assumptions acceptable.	Assumptions acceptable.
	Kurtosis of Global Test of Model Assumptions	Assumptions acceptable.	Assumptions acceptable.
	Link Function of Global Test of Model Assumptions	Assumptions acceptable.	Assumptions acceptable.
	Heteroscedasticity of Global Test of Model Assumptions	Assumptions acceptable.	Assumptions acceptable.
	AIC	2720.3	2722.11
PP during the gestational period ≥ 20 weeks and < 34 weeks	Adjusted R-squared	0.01607	0.01714
	P-value	3.683e-05	7.124e-05
	Global Stat of Global Test of Model Assumptions	Assumptions acceptable.	Assumptions acceptable.
	Skewness of Global Test of Model Assumptions	Assumptions acceptable.	Assumptions acceptable.
	Kurtosis of Global Test of Model Assumptions	Assumptions acceptable.	Assumptions acceptable.
	Link Function of Global Test of Model Assumptions	Assumptions acceptable.	Assumptions acceptable.
	Heteroscedasticity of Global Test of Model Assumptions	Assumptions acceptable.	Assumptions acceptable.
	AIC	2730.64	2730.55
PP during the gestational period ≥ 34 weeks	Adjusted R-squared	0.006982	0.006148
	P-value	0.005562	0.01944
	Global Stat of Global Test of Model Assumptions	Assumptions acceptable.	Assumptions acceptable.
	Skewness of Global Test of Model Assumptions	Assumptions acceptable.	Assumptions acceptable.
	Kurtosis of Global Test of Model Assumptions	Assumptions acceptable.	Assumptions acceptable.
	Link Function of Global Test of Model Assumptions	Assumptions acceptable.	Assumptions acceptable.
	Heteroscedasticity of Global Test of Model Assumptions	Assumptions acceptable.	Assumptions acceptable.
	AIC	2628.47	2630.27
PP, pulse pressure; AIC, Akaike information criterion
Birth weight (outcome) is adjusted for adjusted for gestational age, fetal sex and parity

## Sheet: Table S9
Supplementary Table 9. Genome-wide Significant loci for blood pressure phenotypes and classification based on vasculature relevance
Adffected gene candidates have been identified by one or multiple strategies: (i) GTEX eQTL; (ii) coding, nonsynonymous variants within LD block ; (iii) GenHancer regulatory elements; (iv) nearest to lead and LD-SNP
Relevance to vascular system have been identified by one or multiple strategies: (1)supporting biology (literature); (2) Variant haploblock overlapped with enhancer or regulatory elements functioning in vascular tissues
	Chr	Position	rsID	BioBank JAPAN GWAS summary statistics reported by Kanai et al. (PMID:29403010)															Gene Annotation							Expression levels of annotated gene(s)			ENCODE	Summary of gene function (source or literature)	Classification (relevance to the vascular system)
				Associated BP phenotype	Effect allele	Other allele	SBP			DBP			MAP			PP			Strategies to annotate gene	(i) eQTL	(ii) nonsynonymous variant	(iii) GeneHancer		(iv) Location	Annotated gene	ENTREZ Gene Summary Expression description or Gene expression in GTEx database	Expression in arteries (GTEx database)		Candidate cis-Regulatory Elements (cCRE) active in vascular cells or placenta
							Beta	SE	P-value	Beta	SE	P-value	Beta	SE	P-value	Beta	SE	P-value					GeneHancer.score				Blood vessles tissue having the hiighest expression	The median expression level in the tissue left (TPM)
1	1	10796866	rs880315	SBP, DBP, MAP, PP	C	T	0.03499	0.004063	7.081e-18	0.02794	0.004064	6.25e-12	0.03378	0.004094	1.556e-16	0.02362	0.004047	5.289e-09	(iii)(iv)	not found	not found	GH01J010734	High	CASZ1 (intron)	CASZ1	Broad expression in skin (RPKM 7.7), prostate (RPKM 5.8)	artery_tibial	10.41	EH38E1318315	Involved in vascular assembly and morphogenesis through direct transcriptional regulation of EGFL7 (PMID:23639441, 24150064).	Vasculature related
2	1	113046879	rs3790604	SBP, DBP, MAP	A	C	0.03042	0.00429	1.343e-12	0.02533	0.004291	3.597e-09	0.0298	0.004323	5.507e-12	0.01915	0.004273	7.422e-06	(iii)(iv)	not found	not found	GH01J112501, GH01J112503	High	WNT2B (upstream, intron)	WNT2B	Broad expression in ovary (RPKM 4.3), skin (RPKM 3.1)	artery_aorta	5.409	EH38E1377009	Upregulated by TGF-b/Smad signals and involved in vascular smooth muscle cell proliferation (PMID: 26912210)	Vasculature related
3	2	26920025	rs1731249	SBP, DBP, MAP, PP	T	A	0.04372	0.004576	1.229e-21	0.03285	0.004577	7.078e-13	0.04079	0.004611	8.959e-19	0.03002	0.004557	4.492e-11	(iii)(iv)	not found	not found	GH02J026691, GH02J026693	High	KCNK3 (intron)	KCNK3	Biased expression in adrenal (RPKM 48.3), placenta (RPKM 12.8)	artery_coronary	17.1	EH38E1982171	A potassium channel involved in the regulation of vascular tone; mutations in KCNK3 are associated with pulmonary hypertension (PMID: 23883380, 31406341)	Vasculature related
4	2	54969379	rs72806698	DBP, MAP	T	C	0.04082	0.007764	1.464e-07	0.05354	0.007766	5.418e-12	0.05347	0.007823	8.21e-12	0.007239	0.007734	0.3492	(i)(iv)	1.9e-42 (Thyroid)	not found	GH02J054742	Low	EML6 (intron), EML6-AS1 (downstream)	EML6	Ubiquitous expression in fat (RPKM 28.9), adrenal (RPKM 17.8)	artery_tibial	0.5526	not found	May modify the assembly dynamics of microtubules, such that microtubules are slightly longer, but more dynamic.(Open Targets)	Unknown
5	2	165011827	rs10184428	SBP, MAP	A	C	0.02661	0.003998	2.805e-11	0.01945	0.003999	1.155e-06	0.02452	0.004029	1.163e-09	0.01802	0.003982	6.037e-06	(iv)	not found	not applied	not found	not applied	AC016766.1 (intron)	ENSG00000237844	ENSG00000237844 expression is biased in testis and bladder	not expressed	not expressed	not found	unknown. ENSG00000237844 expression is biased in testis and bladder.(GTEx)	Unlikely related
6	2	240208154	rs2048765	MAP	G	A	0.02069	0.003965	1.805e-07	0.01965	0.003966	7.299e-07	0.02185	0.003996	4.573e-08	0.01107	0.00395	0.005078	(iii)(iv)	not found	not found	GH02J239271, GH02J239272, GH02J239293, GH02J239284, GH02J239288, GH02J239307, GH02J239325	High	HDAC4 (intron)	HDAC4	Ubiquitous expression in brain (RPKM 2.4), testis (RPKM 1.6)	artery_tibial	8.128	EH38E2089107	Responsible for the deacetylation of lysine residues on the N-terminal part of the core histones (H2A, H2B, H3 and H4)(Open Targets)	Unknown
7	3	14895105	rs4684242	SBP, DBP, MAP	C	G	0.02556	0.003959	1.077e-10	0.02449	0.00396	6.232e-10	0.02744	0.00399	6.135e-12	0.01317	0.003943	0.0008423	(iii)(iv)	not found	ENSP00000394827.1:p.Glu125Lys (tolerated, benign)	GH03J014851, GH03J014846, GH03J014836, GH03J014879	High	FGD5 (intron)	FGD5	Ubiquitous expression in brain (RPKM 37.5), thyroid (RPKM 37.4)	artery_tibial	132.6	EH38E2181197 (placenta)	FGD5 mediates proangiogenic action of vascular endothelial growth factor in human vascular endothelial cells (PMID: 22328776)	Vasculature related
8	3	27592860	rs4462906	SBP, MAP, PP	G	T	0.03521	0.00494	1.016e-12	0.01929	0.004941	9.456e-05	0.02899	0.004978	5.777e-09	0.03239	0.00492	4.604e-11	(iii)(iv)	9.3e-5 (Artery_aorta)	not applied	GH03J027552 (rs9847595, r2=0.78)	High	Y_RNA (upstream)	SLC4A7	Ubiquitous expression in duodenum (RPKM 27.5), small intestine (RPKM 8.8)	artery_tibial	24.41	EH38E2187302	LD-SNP (rs9847595, r2=0.78) is an eQTL for SLC4A7 in artery-aorta. SLC4A7 uptake raises VSMC pHi and promotes filopodia, VSMC migration, and hypertrophic inward remodeling ( PMID: 27076468)	Vasculature related
9*	3	53565628	rs3774427	SBP, DBP, MAP	G	C	0.04218	0.005824	4.405e-13	0.04141	0.005826	1.182e-12	0.04642	0.005869	2.594e-15	0.02401	0.005799	3.48e-05	(iii)(iv)	not found	not found	GH03J053747 (rs185521211, r2 = 1 with rs9814480)	High	CACNA1D (intron)	CACNA1D	Broad expression in adrenal (RPKM 4.1), lung (RPKM 2.3)	artery_aorta	0.093	EH38E2203344	A voltage-sensitive calcium channel mediating the entry of calcium ions into excitable cells and are also involved in a variety of calcium-dependent processes. CACNA1D p.D307G mutation could be a risk mutation of early-onset hypertension or preeclampsia (meeting abstract, J Am Coll Cardiol. 2017 Oct, 70 (16_Supplement) C20). Relative mRNA expression of CACNA1D, CACNB2, and CACNB3 was significantl…	Vasculature related
10	4	54796220	rs11725926	PP	T	C	0.02012	0.004968	5.111e-05	-0.0138	0.004969	0.00547	0.001748	0.005007	0.7271	0.0392	0.004949	2.365e-15	(iii)(iv)	not found	not applied	GH04J053937	High	AC058822.1 (intron)	ENSG00000282278	No gene expression data	not applied	not applied	EH38E2297302, EH38E2297308, EH38E2297313	unknown, no expression data (GTEx)	Unknown
11	4	81181072	rs10857147	SBP, DBP, MAP, PP	T	A	0.04658	0.004456	1.429e-25	0.04337	0.004458	2.259e-22	0.04877	0.004491	1.771e-27	0.02734	0.004439	7.288e-10	(i)(iv)	2.5e-8 (Kidney - Cortex)	not applied	not found	not applied	intergenic	FGF5	Biased expression in gall bladder (RPKM 2.1), kidney (RPKM 0.5)	artery_coronary	0.06226	not found	LD-SNP (rs16998073) is an eQTL for FGF5 in kidney. FGF5 is expressed during kidney development and may regulate blood pressure through renal mechanisms. (PMID: 30604766)	Unlikely related (may function mainly in kidney)
12	5	32829929	rs1177765	SBP, MAP	C	T	0.02293	0.003927	5.218e-09	0.02017	0.003928	2.833e-07	0.02317	0.003957	4.72e-09	0.01468	0.003911	0.0001752	(i)(iv)	5.8e-28(Nerve-Tibial)	not applied	GH05J032831	Medium	intergenic	NPR3	Biased expression in kidney (RPKM 35.4), fat (RPKM 14.2)	artery_aorta	15.71	not found	LD-SNP (rs1173727) is an eQTL for NPR3 in nerve-tibial. May function as a clearance receptor for NPPA, NPPB and NPPC, regulating their local concentrations and effects.(Open Targets)	Unknown
13	5	174238893	rs79581935	SBP, MAP	A	T	0.04981	0.008863	1.913e-08	0.03896	0.008863	1.103e-05	0.04876	0.008931	4.775e-08	0.03427	0.008828	0.0001037	(iv)	not found	not applied	not found	not applied	AC113346.2 (intron)	ENSG00000251670	ENSG00000251670 expression is biased in testis and brain basal ganglia	not expressed	not expressed	not found	unknown. ENSG00000251670 expression is restricted to testis.(GTEx)	Unlikely related
14	6	43262704	rs16896398	SBP, DBP, MAP	T	A	0.02913	0.004076	8.88e-13	0.02264	0.004078	2.825e-08	0.02795	0.004108	1.017e-11	0.01918	0.004061	2.314e-06	(iii)(iv)	not found	ENSP00000361650.3:p.Ile188Ser (tolerated, benign)	GH06J043367,GH06J043382, GH06J043380, GH06J043378, GH06J043308, GH06J043334	High	SLC22A7 (upstream)	SLC22A7	Biased expression in liver (RPKM 51.8) and kidney (RPKM 19.9)	artery_coronary	0.01813	not found	Primarily expressed on the basolateral side of hepatocytes and kidney proximal tuble epithelial cells. Mediates sodium-independent multispecific organic anion transport.(Open Targets)	Unlikely related (may function mainly in kidney)
15	6	127146879	rs1105956	DBP, MAP	A	G	0.01979	0.003948	5.387e-07	0.02304	0.00395	5.467e-09	0.02409	0.003979	1.407e-09	0.008053	0.003933	0.0406	(iv)	not found	not applied	not found	not applied	AL356534.1 (intron)	ENSG00000220548 (VIM2P)	ENSG00000220548 expression is biased in brain	not expressed	not expressed	not found	Pseudogene.(Open Targets)	Unlikely related
16	7	19052733	rs57301765	PP	A	G	0.01748	0.00402	1.373e-05	-0.005819	0.004021	0.1479	0.004857	0.004051	0.2306	0.02889	0.004004	5.407e-13	(i)(iii)(iv)	3.2e-7 (Artery_aorta)	not applied	GH07J019009	High	intergenic	TWIST1	Biased expression in fat (RPKM 17.1), endometrium (RPKM 12.4)	artery_aorta	26.24	EH38E2537826	rs57301765 is an eQTL for TWIST1 in Artery - Aorta. Acts as a transcriptional regulator. Twist1 overexpression increases the expression of platelet-derived growth factor (PDGFB) in human pulmonary arterial endothelial (HPAE) cells. Twist 1 controls angiogenesis and involved in pulmonary arterial hypertension (PMID: 32371931, 32692930, 28915063)	Vasculature related
17	7	27243962	rs4722675	SBP, DBP, MAP	G	A	0.02571	0.003962	8.549e-11	0.02416	0.003963	1.072e-09	0.02708	0.003992	1.173e-11	0.0146	0.003946	0.0002166	(i)(iii)(iv)	HOTTIP, 7.2e-5(Colon - Sigmoid); HOXA10-AS, 3.8E-11 (rs6968828)(Artery - Tibial); HOTAIRM1, 1.9E-8 (rs10228276)(Artery - Tibial)	not found	GH07J027187, GH07J027181	High	HOTTIP (intron, downstream)	HOXA10-AS	Biased expression in endometrium (RPKM 40.3), prostate (RPKM 15.7)	artery_tibial	5.504	EH38E2542728	HOXA cluster is important for placental vasculature (PMID: 23501471, 22219351)	Vasculature related
18	7	40460129	rs12538229	PP	C	T	0.01546	0.004009	0.0001154	-0.001099	0.00401	0.7841	0.006673	0.00404	0.09859	0.02289	0.003994	1.001e-08	(i)(iii)(iv)	1.5e-21 (Artery_aorta)	not found	GH07J040436	High	SUGCT (intron)	SUGCT	Biased expression in kidney (RPKM 3.4), liver (RPKM 1.2)	artery_aorta	25.96	EH38E2550673	Catalyzes the succinyl-CoA-dependent conversion of glutarate to glutaryl-CoA.(Open Targets)	Vasculature related
19	7	46007683	rs7791503	PP	T	C	0.01572	0.00467	0.000764	-0.00504	0.004671	0.2806	0.004404	0.004706	0.3494	0.02606	0.004653	2.135e-08	(iii)(iv)	1.3e-5 (Artery_aorta)(rs11977526)	not applied	GH07J045972, GH07J045976, GH07J045983, GH07J046032	High	AC073115.2 (intron)	IGFBP3	Biased expression in placenta (RPKM 686.3), endometrium (RPKM 259.6)	artery_aorta	314.6	EH38E2554191, EH38E2554222	LD-SNP (rs11977526) is an eQTL for IGFBP3 in Artery - Aorta. IGFBP3 modulates the actions of insulin-like growth factors (IGFs), circulating hormones that influence vascular smooth muscle cell function. (PMID:26390057)	Vasculature related
20	7	106405642	rs12705389	PP	T	C	0.02003	0.006117	0.001057	-0.008073	0.006119	0.1871	0.004453	0.006165	0.4701	0.03474	0.006094	1.197e-08	(i)(iii)(iv)	9.1e-12 (Artery_aorta)	not applied	GH07J106765, GH07J106772	High	AC004917.1 (intron)	PRKAR2B	Biased expression in fat (RPKM 215.5), adrenal (RPKM 38.6)	artery_coronary	8.414	EH38E2579620	rs12705389 is an eQTL for PRKAR2B in Artery - Aorta. Regulatory subunit of the cAMP-dependent protein kinases involved in cAMP signaling in cells. Positive association between PRKAR2B expression in aorta artery and SBP/PP was predicted by S-PrediXcan (PMID: 30578418)	Vasculature related
21*	8	143982961	rs62525059	SBP, MAP	G	A	0.02741	0.003945	3.727e-12	0.02066	0.003947	1.647e-07	0.02539	0.003976	1.701e-10	0.0193	0.00393	9.036e-07	(ii)(iii)(iv)	LYNX1, 7.3e-13 (Artery_Tibial)	ENSP00000325822.2:p.Lys173Arg (tolerated, benign) Hyperaldosteronism	GH08J142920	Medium	GML (intron)	CYP11B2	Restricted expression toward adrenal (RPKM 110.5)	artery_aorta	0	not found	A cytochrome P450 monooxygenase that catalyzes the biosynthesis of adrenal mineralocorticoid aldosterone (PMID:11856349, PMID:23322723, PMID:1594605, PMID:9814506).(Open Targets)	Unlikely related (may function mainly in adrenal gland)
22	9	118351011	rs7859905	PP	A	T	0.02558	0.004782	8.826e-08	0.009605	0.004783	0.04464	0.01804	0.004819	0.0001812	0.02683	0.004764	1.777e-08	(iv)	not found	not applied	GH09J115591, GH09J115640	High	AL691420.1 (intron)	ENSG00000228714	ENSG00000228714 expression is biased in testis	not expressed	not expressed	not found	unknown. ENSG00000228714 expression is restricted to testis.(GTEx)	Unlikely related
23	10	104958900	rs112913898	SBP, MAP, PP	G	A	0.03919	0.004798	3.123e-16	0.01814	0.0048	0.0001572	0.02993	0.004835	6.043e-10	0.04013	0.004779	4.602e-17	(i)(iii)(iv)	NT5C2, 5.4e-7 (Artery_Tibial)	not found	GH10J102916, GH10J103190	High	NT5C2 (intron)	NT5C2	Ubiquitous expression in thyroid (RPKM 20.3), esophagus (RPKM 12.5)	artery_tibial	46.26	EH38E1495658	May have a critical role in the maintenance of a constant composition of intracellular purine/pyrimidine nucleotides in cooperation with other nucleotidases. (Open Targets)	Unknown
24	10	105707431	rs11191871	DBP	G	A	0.034	0.007	1.5e-06	0.039	0.007015	1.988e-08	0.04	0.007	1.3e-08	0.011	0.007	0.12	(iii)(iv)	not found	not applied	GH10J103914, GH10J103905	High	intergenic	SLK	Ubiquitous expression in esophagus (RPKM 35.4), lung (RPKM 15.9)	artery_tibial	47.76	EH38E1496405	Mediates apoptosis and actin stress fiber dissolution.(Open Targets)	Unknown
25*	11	1887068	rs569550	SBP, MAP	G	T	0.02693	0.004762	1.565e-08	0.02535	0.004764	1.031e-07	0.02804	0.004799	5.156e-09	0.01488	0.004743	0.001708	(iii)(iv)	7.5e-13 (Cells - Cultured fibroblasts)	ENSP00000371194.1:p.His34Gln (rs7938342)(delitorious-low confidence, benign)	GH11J001869, GH11J001870	High	LSP1 (intron)	LSP1	Broad expression in spleen (RPKM 60.6), appendix (RPKM 43.3)	artery_aorta	18.21	EH38E1514958	LSP1 is an intracellular F-actin binding protein, expressed in lymphocytes, neutrophils, macrophages, and endothelium and may regulate neutrophil motility, adhesion to fibrinogen matrix proteins, and transendothelial migration. (Open Targets)	Unlikely related (may function mainly in immune cells)
26	11	9765503	rs4910498	MAP	T	A	0.02154	0.004119	1.704e-07	0.0213	0.004119	2.336e-07	0.02332	0.00415	1.932e-08	0.01117	0.004102	0.006459	(i)(ii)(iii)(iv)	7.9e-15 (Artery - Tibial)	ENSP00000315630.6:p.Gln505Ter (Stop gained)	GH11J009751, GH11J009737, GH11J009744, GH11J009748, GH11J009773, GH11J009786	High	SWAP70 (intron)	SWAP70	Ubiquitous expression in lymph node (RPKM 33.7), spleen (RPKM 30.6)	artery_tibial	54.76	not found	PI(3,4,5)P3-dependent GEF which , independent of RAS, transduces signals from tyrosine kinase receptors to RAC. (Open Targets)	Unknown
27	11	89224453	rs2289125	PP	C	A	0.02115	0.004179	4.168e-07	0.00272	0.00418	0.5153	0.01173	0.004212	0.005343	0.02881	0.004163	4.507e-12	(iii)(iv)	not found	not found	GH11J089489	High	NOX4 (5' UTR, upstream)	NOX4	Biased expression in kidney (RPKM 23.6) and endometrium (RPKM 1.5)	artery_aorta	36.8	EH38E1560088	Constitutive NADPH oxidase which generates superoxide intracellularly upon formation of a complex with CYBA/p22phox. Nox4 expression is increased in vascular endothelial cells with BP-increasing allele. NOX4 mediates endothelial cell apoptosis and facilitates vasculat collagen synthesis, contributing to endothelial dysfunction and arterial stiffness, and may explain the association with PP (PMID:…	Vasculature related
28	11	100578884	rs6590811	SBP, DBP, MAP	T	C	0.02634	0.003852	7.96e-12	0.0232	0.003853	1.736e-09	0.02677	0.003882	5.381e-12	0.0148	0.003837	0.000115	(i)(iii)(iv)	9.6e-26 (Artery - Tibial)	not found	GH11J100684, GH11J100676, GH11J100735, GH11J100726	High	ARHGAP42 (intron)	ARHGAP42	Ubiquitous expression in placenta (RPKM 4.3), thyroid (RPKM 3.5)	artery_tibial	5.702	EH38E1564290	rs6590811 is an eQTL for ARHGAP42 in artery-aorta and artery-tibial. May influence blood pressure by functioning as a GTPase-activating protein for RHOA in vascular smooth muscle(PMID: 24335996)	Vasculature related
29	12	12873748	rs34327	MAP	C	T	0.0191	0.003837	6.459e-07	0.02067	0.003838	7.244e-08	0.02153	0.003867	2.6e-08	0.009057	0.003822	0.01781	(i)(iii)(iv)	9.7e-28 (Cells - Cultured fibroblasts)	not found	GH12J012713, GH12J012733	High	CDKN1B (intron)	APOLD1	Broad expression in fat (RPKM 54.0), thyroid (RPKM 52.1)	artery_tibial	71.11	EH38E1593759, EH38E1593770, EH38E1593775, EH38E1593787	rs34327 is an eQTL for APOLD1 in cultured fibroblast. APOLD1 is an endothelial cell early response protein that may play a role in regulation of endothelial cell signaling and vascular function (PMID:15102925)	Vasculature related
30	12	89989599	rs1401982	SBP, DBP, MAP, PP	A	G	0.0395	0.003925	8.07e-24	0.02685	0.003926	8.002e-12	0.0353	0.003955	4.433e-19	0.03094	0.00391	2.523e-15	(i)(iii)(iv)	2.3e-7(Artery - Tibial)	not found	GH12J089631, GH12J089647	High	ATP2B1 (intron)	ATP2B1	Ubiquitous expression in brain (RPKM 34.3), bone marrow (RPKM 16.4)	artery_tibial	12.76	not found	rs1401982 is an eQTL for ATP2B1 in artery-tibial. Plays a role in blood pressure regulation through regulation of intracellular calcium concentration and nitric oxide production leading to regulation of vascular smooth muscle cells vasoconstriction (PMID: 22311909, 24805951, 29046519)The common single-nucleotide polymorphism rs2681472 is associated with early-onset preeclampsia in Northern Han Ch…	Vasculature related
31	12	111718231	rs79105258	SBP, DBP, MAP, PP	C	A	0.06463	0.004732	1.798e-42	0.062	0.004733	3.299e-39	0.06847	0.004768	9.093e-47	0.0334	0.004712	1.372e-12	(iv)	not found	not found	not found	not applied	CUX2 (intron)	CUX2	Biased expression in prostate (RPKM 4.9), liver (RPKM 4.6)	artery_aorta	0.03596	not found	CUX2 is a ranscription factor involved in the control of neuronal proliferation and differentiation in the brain.(Open Targets). Association of CUX2-ALDH2 loci with BP is East Asian specific, and alcohol tolerance, intake and metabolic regulation may be involved (PMID:28887369, 21572416, 31089300)	Unknown
32	12	115552878	rs35443	SBP, DBP, MAP	G	C	0.03405	0.004349	4.928e-15	0.0315	0.00435	4.44e-13	0.03619	0.004383	1.479e-16	0.01959	0.004332	6.11e-06	(iv)	not found	not found	not found	not applied	intergenic	TBX3	(TBX3) Biased expression in adrenal (RPKM 89.8), prostate (RPKM 51.1)	(TBX3) artery_coronary	(TBX3) 5.739	not found	TBX3 is a transcriptional repressor involved in developmental processes. Probably plays a role in limb pattern formation. Acts as a negative regulator of PML function in cellular senescence.(Open Targets)	Unlikely related
33	15	85464630	rs1451538	SBP	C	T	0.04382	0.007887	2.76e-08	0.03075	0.007887	9.638e-05	0.0397	0.007947	5.881e-07	0.03029	0.007853	0.0001144	(iii)(iv)	not found	not found	GH15J084910	Hgh	SLC28A1 (intron)	SLC28A1	Biased expression in kidney (RPKM 9.5), small intestine (RPKM 9.4)	artery_aorta	0.7497	not found	Sodium-dependent and pyrimidine-selective transporter (PubMed:21998139). It may be involved in the intestinal absorption and renal handling of pyrimidine nucleoside analogs such as AZT.(Open Targets)	Unlikely related (may function mainly in intestine and kidney)
34	15	91416550	rs17514846	SBP	A	C	0.02987	0.005398	3.148e-08	0.02319	0.005399	1.744e-05	0.0284	0.00544	1.788e-07	0.02011	0.005378	0.0001845	(i)(iii)(iv)	FURIN, 4.6e-6(Artery - Tibial); FES, 5.7e-9(Artery - Tibial)	not found	GH15J090862, GH15J090867	Hgh	FURIN (intron)	FURIN	Ubiquitous expression in salivary gland (RPKM 50.5), liver (RPKM 36.0)	artery_aorta	432	EH38E1787879 (placenta)	rs17514846 is an eQTL for FURIN in artery-tibial. FURIN levels in vascular endothelial cells affect monocyte-endothelial adhesion and migration (PMID: 32067586).	Vasculature related
35	18	721563	rs8098380	SBP, DBP, MAP	A	C	0.02591	0.003938	4.755e-11	0.02425	0.003939	7.449e-10	0.02764	0.003968	3.287e-12	0.01572	0.003922	6.159e-05	(i)(iii)(iv)	6.6e-54(Muscle - Skeletal)(rs2741187)	not found	GH18J000708	Hgh	YES1 (downstream)	ENOSF1	Ubiquitous expression in bone marrow (RPKM 9.5), kidney (RPKM 9.5)	artery_aorta	16.36	EH38E1894687, EH38E1894689	LD-SNP (rs1173727) is an eQTL for ENOSF1 in muscle-skeletal. Plays a role in the catabolism of L-fucose, a sugar that is part of the carbohydrates that are attached to cellular glycoproteins. (Open Targets)	Unknown
36	19	2177625	rs55678414	PP	G	T	0.02105	0.004325	1.13e-06	-0.003766	0.004326	0.3839	0.007675	0.004358	0.07821	0.03061	0.004308	1.205e-12	(i)(iii)(iv)	AP3D1, 7.5e-8(Artery - Tibial); PLEKHJ1, 3.9e-6(Artery - Tibial); DOT1L, 4.8e-5(Artery - Tibial)	not found	GH19J002175, GH19J002160	Hgh	DOT1L (intron)	DOT1L	Broad expression in testis (RPKM 18.3), bone marrow (RPKM 5.1)	artery_coronary	11.36	EH38E1932073, (EH38E1932136)	Histone methyltransferase. Methylates 'Lys-79' of histone H3. Nucleosomes are preferred as substrate compared to free histones (PMID:12123582). (Open Targets)DOT1L cooperates with transcription factor ETS-1 to stimulate the expression of VEGFR2, thereby activating ERK1/2 and AKT signaling pathways and promoting angiogenesis. (PMID:27626484)	Vasculature related
37*	19	19263938	rs58190593	DBP, MAP	T	C	0.02249	0.004187	7.777e-08	0.02389	0.004188	1.177e-08	0.02567	0.004219	1.174e-09	0.01107	0.00417	0.007915	(iii)(iv)	not found	not found	GH19J019160	Hgh	BORCS8-MEF2B (intron), MEF2B (intron)	MEF2B	Broad expression in lymph node (RPKM 18.6), appendix (RPKM 7.2)	artery_aorta	11.17	not found	Transcriptional activator which binds specifically to the MEF2 element, 5'-YTA[AT](4)TAR-3', found in numerous muscle-specific genes. May be involved in muscle-specific and/or growth factor-related transcription.(Open Targets)	Unlikely related
38	20	19494801	rs1109605	PP	C	T	0.01431	0.003973	0.0003166	-0.00221	0.003974	0.5781	0.005702	0.004004	0.1544	0.02242	0.003957	1.47e-08	(iv)	4.1e-5 (Artery_aorta)	not found	GH20J019520	Medium	SLC24A3 (intron)	SLC24A3	Broad expression in endometrium (RPKM 17.0), esophagus (RPKM 12.0)	artery_tibial	46.27	not found	Potassium-dependent sodium/calcium exchanger. In preeclampsia animal model, SLC24A3(NCKX3) expression was increased in the placenta of hypoxic rats (PMID: 23255337)	Vasculature related
39	20	42795152	rs6031431	SBP, MAP	G	A	0.02443	0.004103	2.612e-09	0.0207	0.004104	4.53e-07	0.02443	0.004134	3.423e-09	0.01573	0.004086	0.0001188	(i)(iii)(iv)	6.1e-17(Cells - Cultured fibroblasts)	not found	GH20J044165, GH20J044169	Hgh	JPH2 (intron)	JPH2	Biased expression in heart (RPKM 14.9), prostate (RPKM 9.1)	artery_tibial	97.35	not found	Membrane-binding protein that provides a structural bridge between the plasma membrane and the sarcoplasmic reticulum and is required for normal excitation-contraction coupling in cardiomyocytes (PMID:20095964).	Unlikely related (may function mainly in cardiomyocyte)
40	20	57472174	rs1407040	DBP, MAP	C	T	0.0177	0.004246	3.065e-05	0.02473	0.004246	5.756e-09	0.02353	0.004278	3.799e-08	0.00382	0.004228	0.3663	(iii)(iv)	RP1-309F20.4, 8.9e-17(Thyroid)	not found	GH20J058887, GH20J058881	Hgh	GNAS (intron)	GNAS	Ubiquitous expression in thyroid (RPKM 405.2), brain (RPKM 137.2)	artery_aorta	339.7	EH38E2125800, EH38E2125813	Guanine nucleotide-binding proteins (G proteins) function as transducers in numerous signaling pathways controlled by G protein-coupled receptors (GPCRs) (PubMed:17110384).	Unknown
41	22	29252732	rs5762862	MAP	A	G	0.01878	0.003833	9.652e-07	0.02067	0.003834	7.004e-08	0.02143	0.003863	2.881e-08	0.008604	0.003818	0.02421	ZNRF3	1.9e-13(Artery - Aorta)	not found	GH22J028807, GH22J028902	Hgh	intergenic	ZNRF3	Ubiquitous expression in kidney (RPKM 4.8), brain (RPKM 4.7)	artery_aorta	13.14	EH38E2156492 (placenta)	rs5762862 is an eQTL for ZNRF3 in artery-aorta. E3 ubiquitin-protein ligase that acts as a negative regulator of the Wnt signaling pathway by mediating the ubiquitination and subsequent degradation of Wnt receptor complex components Frizzled and LRP6. (Open Targets)	Unknown
*Because there were two sentinel SNPs with the same directional effect in the same region, they were combined into one of them.

## Sheet: Table S10
Supplementary Table 10. Variants constituting SBP-increasing PGS at the p-value threshold of 1 x 10-6 and classification based on vasculature relevance
Adffected gene candidates have been identified by one or multiple strategies: (i) GTEX eQTL; (ii) coding, nonsynonymous variants within LD block ; (iii) GenHancer regulatory elements; (iv) nearest to lead and LD-SNP
Relevance to vascular system have been identified by one or multiple strategies: (1)supporting biology (literature); (2) Variant haploblock overlapped with enhancer or regulatory elements (cCRE) functioning in vascular tissues
	SNP	Chromosome	Position.hg19	Position.hg38	Effect allele	Other allele	Effect.size	SE	P-value	EAF	Gene Annotation								Expression levels of annotated gene			ENCODE	Summary of gene function (source or literature)	Classification (relevance to the vascular system)
											Strategies	(i) eQTL	(ii) nonsynonymous variant	(iii) GeneHancer			(iv) Nearest gene	Annotated gene	ENTREZ.Gene.Summary.Expression	Blood vessles tissue having the hiighest expression	The median expression level in the tissue left (TPM)	cCRE active in vascular cells or placenta
														item	GeneHancer.score	GeneCards
1	rs880315	1	10796866	10736809	C	T	0.03499	0.004063	7.081e-18	0.6809	(iii)(iv)	not found	not found	GH01J010734	High	CASZ1	CASZ1	CASZ1	Broad expression in skin (RPKM 7.7), prostate (RPKM 5.8)	artery_tibial	10.41	EH38E1318315	Involved in vascular assembly and morphogenesis through direct transcriptional regulation of EGFL7 (PMID:23639441, 24150064).	Vasculature related
2	rs3790604	1	113046879	112504257	A	C	0.03042	0.00429	1.343e-12	0.2974	(iii)(iv)	not found	not found	GH01J112501, GH01J112503	High	WNT2B	WNT2B	WNT2B	Broad expression in ovary (RPKM 4.3), skin (RPKM 3.1)	artery_aorta	5.409	EH38E1377009	Upregulated by TGF-b/Smad signals and involved in vascular smooth muscle cell proliferation (PMID: 26912210)	Vasculature related
3	rs1731249	2	26920025	26697157	T	A	0.04372	0.004576	1.229e-21	0.7734	(iii)(iv)	not found	not found	GH02J026691	High	KCNK3	KCNK3	KCNK3	Biased expression in adrenal (RPKM 48.3), placenta (RPKM 12.8) and lung, pancreas, prostate, heart, brain	artery_coronary	17.1	EH38E1982171	A potassium channel involved in the regulation of vascular tone; mutations in KCNK3 are associated with pulmonary hypertension (PMID: 23883380, 31406341)	Vasculature related
4	rs72806698	2	54969379	54742242	T	C	0.04082	0.007764	1.464e-07	0.0667	(i)(iv)	1.9e-42 (Thyroid)	not found	GH02J054742	Low	EML6	EML6	EML6	Ubiquitous expression in fat (RPKM 28.9), adrenal (RPKM 17.8)	artery_tibial	0.5526	not found	May modify the assembly dynamics of microtubules, such that microtubules are slightly longer, but more dynamic.(Open Targets)	Unknown
5	rs10185395	2	164447403	163590893	T	G	0.02078	0.00381	4.955e-08	0.5602	(iii)(iv)	not found	not found	GH02J163601, EH38E2047122	Medium	No results	FIGN	FIGN	Ubiquitous expression in ovary (RPKM 1.1), fat (RPKM 1.0)	artery_aorta	9.438	not found	ATP-dependent microtubule severing protein. (Open Targets)	Unlikely related
6	rs10184428	2	165011827	164155317	A	C	0.02661	0.003998	2.805e-11	0.574	(iv)	not found	not found	not found	not applied	GRB14	GRB14	Lnc-FIGN-1 (ENSG00000237844)	ENSG00000237844 expression is biased in testis and bladder	not expressed	not expressed	not found	Unknown	Unlikely related
7	rs6745266	2	240193575	239271879	A	G	0.02188	0.004179	1.646e-07	0.3379	(iii)(iv)	not found	not found	GH02J239272	High	HDAC4	HDAC4	HDAC4	Ubiquitous expression in brain (RPKM 2.4), testis (RPKM 1.6)	artery_tibial	8.128	not found	Responsible for the deacetylation of lysine residues on the N-terminal part of the core histones (H2A, H2B, H3 and H4)(Open Targets)	Unknown
8	rs4684242	3	14895105	14853598	C	G	0.02556	0.003959	1.077e-10	0.3543	(i)(iv)	FGD5-AS1, 5.0e-5 (Cultured fibroblasts)	ENSP00000394827.1:p.Glu125Lys (tolerated, benign)	not found	not applied	FGD5	FGD5	FGD5-AS1	Ubiquitous expression in brain (RPKM 37.5), thyroid (RPKM 37.4)	artery_tibial	132.6	GH03J014851,GH03J014846,GH03J014836	FGD5 mediates proangiogenic action of vascular endothelial growth factor in human vascular endothelial cells (PMID: 22328776)	Vasculature related
9	rs151207148	3	27385666	27344175	A	T	0.06448	0.01224	1.366e-07	0.0282	(iv)	not found	not found	not found	not applied	NEK10	NEK10	NEK10	Biased expression in testis (RPKM 2.8), brain (RPKM 0.3)	artery_tibial	0.3693	not found	Plays a role in the cellular response to UV irradiation. (Open Targets)	Unlikely related
10	rs4462906	3	27592860	27551369	G	T	0.03521	0.00494	1.016e-12	0.291	(i)(iii)(iv)	SLC4A7, 9.3e-5 (Artery_aorta)	not found	GH03J027552 (rs9847595, r2=0.78)	High	EOMES	SLC4A7	SLC4A7	Ubiquitous expression in duodenum (RPKM 27.5), small intestine (RPKM 8.8)	artery_tibial	24.41	EH38E2187302	SLC4A7 uptake raises VSMC pHi and promotes filopodia, VSMC migration, and hypertrophic inward remodeling ( PMID: 27076468)	Vasculature related
11	rs1008339	3	53572890	53538863	C	G	0.02405	0.003846	4.018e-10	0.4411	(iii)(iv)	not found	not found	GH03J053559	low	CACNA1D	CACNA1D	CACNA1D	Broad expression in adrenal (RPKM 4.1), lung (RPKM 2.3)	artery_aorta	0.093	EH38E2203167 (weak)	A voltage-sensitive calcium channel mediating the entry of calcium ions into excitable cells and are also involved in a variety of calcium-dependent processes. CACNA1D p.D307G mutation could be a risk mutation of early-onset hypertension or preeclampsia (meeting abstract, J Am Coll Cardiol. 2017 Oct, 70 (16_Supplement) C20). Relative mRNA expression of CACNA1D, CACNB2, and CACNB3 was significantl…	Vasculature related
12	rs9814480	3	53590465	53556438	T	C	0.04209	0.005778	3.234e-13	0.1238	(iii)(iv)	not found	not found	GH03J053747	High	CACNA1D	CACNA1D	CACNA1D	Broad expression in adrenal (RPKM 4.1), lung (RPKM 2.3)	artery_aorta	0.093	EH38E2203159, EH38E2203164, EH38E2203165		Vasculature related
13	rs62250902	3	53842251	53808224	C	T	0.0278	0.005264	1.285e-07	0.8409	(iii)(iv)	not found	not found	GH03J053820	High	CACNA1D	CACNA1D	CHDH	Broad expression in kidney (RPKM 17.5), liver (RPKM 4.8)	artery_aorta	1.508	EH38E2203375, EH38E2203372 (weak)	The protein encoded by this gene is a choline dehydrogenase that localizes to the mitochondrion.	Unlikely related
14	rs4687590	3	53861137	53827110	A	G	0.01919	0.003862	6.716e-07	0.5353	(i)(iv)	CHDH, 2.6e-6 (Muscle - Skeletal)	not found	GH03J053828	medium	CHDH	CHDH	CHDH	Broad expression in kidney (RPKM 17.5), liver (RPKM 4.8)	artery_aorta	1.508	not found		Unlikely related
15	rs6445838	3	56950852	56916824	A	G	0.01959	0.004004	9.911e-07	0.6378	(iii)(iv)	not found	not found	GH03J056915	High	ARHGEF3	ARHGEF3	ARHGEF3	Ubiquitous expression in endometrium (RPKM 17.9), adrenal (RPKM 16.7)	artery_coronary	9.024	not found	Rho-like GTPases are involved in a variety of cellular processes, and they are activated by binding GTP and inactivated by conversion of GTP to GDP by their intrinsic GTPase activity.	Unlikely related
16	rs79620921	4	81155937	80234783	T	A	0.02176	0.004441	9.613e-07	0.2549	(iii)(iv)	not found	not found	GH04J080234	High	No results	PRDM8	FGF5	Biased expression in gall bladder (RPKM 2.1), kidney (RPKM 0.5)	artery_coronary	0.06226	not found	FGF5 is expressed during kidney development and may regulate blood pressure through renal mechanisms. (PMID: 30604766)	Unlikely related (may function mainly in kidney)
17	rs10857147	4	81181072	80259918	T	A	0.04658	0.004456	1.429e-25	0.3014	(i)(iv)	FGF5, 2.5e-8 (Kidney - Cortex)	not found	not found	not applied	FGF5	FGF5	FGF5	Biased expression in gall bladder (RPKM 2.1), kidney (RPKM 0.5)	artery_coronary	0.06226	not found		Unlikely related (may function mainly in kidney)
18	rs3822015	4	81189603	80268449	C	A	0.02409	0.00462	1.839e-07	0.786	(i)(iii)(iv)	FGF5, 6.9e-06(Brain - Cerebellar Hemisphere)	not found	GH04J080264	High	FGF5	FGF5	FGF5	Biased expression in gall bladder (RPKM 2.1), kidney (RPKM 0.5)	artery_coronary	0.06226	not found		Unlikely related (may function mainly in kidney)
19	rs56388530	4	106910958	105989801	T	C	0.02225	0.004315	2.511e-07	0.6438	(iii)(iv)	not found	not found	GH04J105988	High	AIMP1	NPNT	NPNT	Biased expression in thyroid (RPKM 91.1), lung (RPKM 60.2)	artery_aorta	200.4	EH38E2317807, EH38E2317810	Functional ligand of integrin alpha-8/beta-1 in kidney development.(Open Targets)	Unknown
20	rs7667370	4	111333601	110412445	G	T	0.02314	0.0046	4.912e-07	0.2356	(iv)	not found	not found	GH04J110472	Medium	No results	ENPEP	ENPEP	Biased expression in small intestine (RPKM 132.9), kidney (RPKM 71.6)	artery_coronary	10.04	not found	Regulates central hypertension through its calcium-modulated preference to cleave N-terminal acidic residues from peptides such as angiotensin II. (Open Targets)	Unlikely related
21	rs1177765	5	32829929	32829823	C	T	0.02293	0.003927	5.218e-09	0.5951	(i)(iii)((iv)	NPR3, 5.8e-28(Nerve-Tibial)	not found	GH05J032831	Medium	NPR3	CSMD1	NPR3	Biased expression in kidney (RPKM 35.4), fat (RPKM 14.2)	artery_aorta	15.71	not found	May function as a clearance receptor for NPPA, NPPB and NPPC, regulating their local concentrations and effects.(Open Targets) The BP-elevating alleles also increased VSMC proliferation, angiotensin II-induced calcium flux and cell contraction. (PMID:29040610)	Vasculature related
22	rs79209537	5	148400668	149021105	A	G	0.03815	0.007702	7.28e-07	0.9312	(i)(iv)	ABLIM3, 6.6e-14(Muscle - Skeletal), 5.2e-9(Cells - Cultured fibroblasts0	not found	not found	not applied	SH3TC2	SH3TC2	ABLIM3	Broad expression in fat (RPKM 33.5), heart (RPKM 19.5)	artery_coronary	28.62	not found	May act as scaffold protein.(Open Targets)	Unlikely related
23	rs79581935	5	174238893	174811890	A	T	0.04981	0.008863	1.913e-08	0.9518	(iv)	not found	not found	not found	not applied	LOC105377742	MSX2	ENSG00000251670 (Lnc-MSX2-3)	ENSG00000251670 expression is biased in testis and brain basal ganglia	not expressed	not expressed	not found	Unknown	Unlikely related
24	rs16896398	6	43262704	43294966	T	A	0.02913	0.004076	8.88e-13	0.346	(iii)(iv)	not found	ENSP00000361650.3:p.Ile188Ser (tolerated, benign)	GH06J043367,GH06J043382, GH06J043380, GH06J043378, GH06J043308, GH06J043334	High	SLC22A7	SLC22A7	SLC22A7	Biased expression in liver (RPKM 51.8) and kidney (RPKM 19.9)	artery_coronary	0.01813	not found	Primarily expressed on the basolateral side of hepatocytes and kidney proximal tuble epithelial cells. Mediates sodium-independent multispecific organic anion transport.(Open Targets)	Unlikely related
25	rs1105956	6	127146879	126825734	A	G	0.01979	0.003948	5.387e-07	0.4276	(iii)(iv)	not found	not found	GH06J126824	Medium	RSPO3, ENSG00000286215	RSPO3	ENSG00000220548 (VIM2P)	ENSG00000220548 expression is biased in brain	artery_tibial	0	not found	Unknown	Unlikely related
26	rs4723350	7	1038627	998991	T	C	0.02046	0.004166	9.036e-07	0.2967	(iii)(iv)	not found	not found	GH07J001022, GH07J001015, GH07J000998	High	C7orf50	C7orf50	CYP2W1	Biased expression in skin (RPKM 2.9), duodenum (RPKM 2.7)	artery_tibial	0.08112	not found	A cytochrome P450 monooxygenase that may play a role in retinoid and phospholipid metabolism (PMID:22591743, PMID:26936974).	Unlikely related
27	rs11762730	7	27190398	27150779	A	C	0.02768	0.005077	4.978e-08	0.179	(i)(iii)(iv)	HOTAIRM1, 2.4e-20(Artery - Tibial)	not found	GH07J027095	High	HOXA3	HOXA3	HOTAIRM1 (HOX cluster)	Broad expression in adrenal (RPKM 4.5), spleen (RPKM 4.0)	artery_aorta	22.43	EH38E2542612 , EH38E2542609, EH38E2542613 and others	HoxA cluster genes are involved in vascular development (PMID:11073881 ) and placental vasculature(PMID: 23501471, 22219351)	Vasculature related
28	rs4722675	7	27243962	27204343	G	A	0.02571	0.003962	8.549e-11	0.6138	(i)(iii)(iv)	HOTTIP, 7.2e-5(Colon - Sigmoid)	not found	GH07J027187	High	HOTTIP	HOXA13	HOTTIP, HOXA13	Biased expression in colon (RPKM 4.0), prostate (RPKM 3.7)	artery_tibial	0.025	EH38E2542769(weak)		Vasculature related
29	rs66934008	8	76851436	75939201	G	A	0.01925	0.003806	4.266e-07	0.537	(iv)	not found	not found	not found	not applied	No results	HNF4G	intergenic	not applied	not applied	not applied	not found	Unknown	Unlikely related
30	rs62525059	8	143982961	142901545	G	A	0.02741	0.003945	3.727e-12	0.6358	(ii)(iii)(iv)	GML, 2.5e-29(Testis)	ENSP00000325822.2:p.Lys173Arg (tolerated, benign) Hyperaldosteronism	GH08J142913	Medium	CYP11B2, CYP11B1	GML	CYP11B2	Restricted expression toward adrenal (RPKM 1098.5)	artery_aorta	0	not found	GH08J142913 is a putative enhancer for CYP11B1 in Adrenal Gland. Involved in the biosynthesis of adrenal corticoids.(Open Targets)	Unlikely related
31	rs7859905	9	118351011	115588732	A	T	0.02558	0.004782	8.826e-08	0.1937	(iv)	not found	not found	not found	not applied	SLK, ENSG00000228714	DEC1	ENSG00000228714 (AL691420.1)	ENSG00000228714 expression is biased in testis	not expressed	not expressed	not found	Unknown	Unlikely related
32	rs2274224	10	96039597	94279840	G	C	0.01946	0.003829	3.705e-07	0.5479	(i)(iv)	1.3e-6(Artery - Tibial)	ENSP00000360426.1:p.Arg1267Gln	not found	not applied	PLCE1	PLCE1	PLCE1	Broad expression in colon (RPKM 6.3), endometrium (RPKM 5.5)	artery_tibial	22.91	not found	The production of the second messenger molecules diacylglycerol (DAG) and inositol 1,4,5-trisphosphate (IP3) is mediated by activated phosphatidylinositol-specific phospholipase C enzymes. (Open Targets)	Unknown
33	rs7912147	10	104521661	102761904	A	G	0.02563	0.004357	4.054e-09	0.2579	(i)(iii)(iv)	SFXN2, 9.9e-7(Artery - Aorta)	not found	GH10J102761, GH10J102743, GH10J102738	High	WBP1L	WBP1L	SFXN2	Broad expression in kidney (RPKM 25.3), thyroid (RPKM 4.8)	artery_coronary	2.431	not found	Mitochondrial amino-acid transporter that mediates transport of serine into mitochondria. sideroflexin 2 (SFXN2), a member of the SFXN protein family, is involved in mitochondrial iron metabolism.(PMID:30570704)	Unlikely related
34	rs112913898	10	104958900	103199143	G	A	0.03919	0.004798	3.123e-16	0.7495	(i)(iii)(iv)	NT5C2,5.4e-7(Artery_Tibial)	not found	GH10J102916, GH10J103190	High	NT5C2	NT5C2	NT5C2	Ubiquitous expression in thyroid (RPKM 20.3), esophagus (RPKM 12.5)	artery_tibial	46.26	EH38E1495658	May have a critical role in the maintenance of a constant composition of intracellular purine/pyrimidine nucleotides in cooperation with other nucleotidases. (Open Targets)	Unknown
35	rs17116149	10	105688050	103928292	A	G	0.03635	0.007383	8.5e-07	0.082	(iv)	not found	not found	GH10J103914	Medium	SLK	STN1	SLK	Ubiquitous expression in esophagus (RPKM 35.4), lung (RPKM 15.9)	artery_tibial	47.76	EH38E1496405	Mediates apoptosis and actin stress fiber dissolution.(Open Targets) Recent studies demonstrate that cardiac-specific deletion of the Hippo pathway kinase Mst (STE20-like protein kinases) co-activator WW45 (WW domain-containing adaptor 45), Mst1, Mst2, or Lats2 (large tumor suppressor homologue 2) in mice result in over-grown hearts with elevated cardiomyocyte proliferation.(PMID:25050107) SLK (S…	Unknown
36	rs180913	10	115738559	113978800	A	T	0.01936	0.003902	6.994e-07	0.453	(iii)(iv)	not found	not found	GH10J113956, GH10J113981	High	ADRB1	NHLRC2	ADRB1	No results	artery_coronary	2.323	EH38E1501249 (placenta)	Beta-adrenergic receptors mediate the catecholamine-induced activation of adenylate cyclase through the action of G proteins.several studies have shown that Adrb1 can also participate in blood vessel relaxation (O'Donnell and Wanstall, 1984; Graves and Poston, 1993). Interestingly, recent evidences suggest that Adrb1 appear to be mainly responsible for vasorelaxation in mouse (Chruscinski et al.,…	Vasculature related
37	rs74850266	10	115744435	113984676	C	T	0.03217	0.006271	2.895e-07	0.8966	(iii)(iv)	not found	not found	GH10J113956	High	No results	ADRB1	ADRB1		artery_coronary	2.323	not found		Vasculature related
38	rs569550	11	1887068	1865838	G	T	0.02693	0.004762	1.565e-08	0.7746	(i)(ii)(iii)(iv)	LSP1, 7.5e-13(Cells - Cultured fibroblasts)	ENSP00000371194.1:p.His34Gln (rs7938342)(delitorious-low confidence, benign)	GH11J001869	High	LSP1	LSP1	LSP1	Broad expression in spleen (RPKM 60.6), appendix (RPKM 43.3)	artery_aorta	18.21	EH38E1514958	LSP1 is an intracellular F-actin binding protein, expressed in lymphocytes, neutrophils, macrophages, and endothelium and may regulate neutrophil motility, adhesion to fibrinogen matrix proteins, and transendothelial migration. (Open Targets)	Unlikely related (may function mainly in immune cells)
39	rs643753	11	1949470	1928240	A	G	0.02095	0.004086	2.936e-07	0.64	(i)(iii)(iv)	TNNT3, 4.2e-14(Heart - Left Ventricle)	not found	GH11J001916	High	TNNT3	TNNT3	TNNT3	Biased expression in esophagus (RPKM 25.1), prostate (RPKM 20.2)	artery_tibial	8.892	EH38E1515018 (placenta)	Troponin T is the tropomyosin-binding subunit of troponin, the thin filament regulatory complex which confers calcium-sensitivity to striated muscle actomyosin ATPase activity. (Open Targets)	Unknown
40	rs12417375	11	2021893	2000663	A	T	0.03662	0.007374	6.805e-07	0.9283	(iii)(iv)	not found	not found	GH11J001985	High	MRPL23, H19	MRPL23	H19	Biased expression in placenta (RPKM 2773.7), adrenal (RPKM 234.1)	artery_coronary	22.26	not found	H19 imprinted maternally expressed transcript (Open targets) Long noncoding RNA H19 upregulates vascular endothelial growth factor A to enhance mesenchymal stem cells survival and angiogenic capacity by inhibiting miR-199a-5p (PMID: 29673400)	Vasculature related
41	rs360140	11	9776567	9755020	A	C	0.02157	0.004022	8.193e-08	0.6662	(i)(iii)(iv)	SWAP70, 3.4e-16(Artery - Tibial)	not found	GH11J009751	High	LINC02709	SWAP70	SWAP70	Ubiquitous expression in lymph node (RPKM 33.7), spleen (RPKM 30.6)	artery_tibial	54.76	EH38E1519513	PI(3,4,5)P3-dependent GEF which , independent of RAS, transduces signals from tyrosine kinase receptors to RAC. (Open Targets)	Unknown
42	rs2289123	11	89224718	89491550	T	G	0.02132	0.004208	4.054e-07	0.5045	(iii)(iv)	not found	not found	GH11J089489	High	NOX4	NOX4	NOX4	Biased expression in kidney (RPKM 23.6) and endometrium (RPKM 1.5)	artery_aorta	36.8	EH38E1560088	Constitutive NADPH oxidase which generates superoxide intracellularly upon formation of a complex with CYBA/p22phox. Nox4 has a ubiquitous distribution and that it is expressed in many organ systems, such as the vasculature, and in many cell types including endothelial and vascular smooth muscle cells and in adventitial fibroblasts and adipocytes (PMID:22539753)	Vasculature related (Direction not determined)
43	rs6590811	11	100578884	100708152	T	C	0.02634	0.003852	7.96e-12	0.4467	(i)(iii)(iv)	ARHGAP42, 9.6e-26(Artery - Tibial)	not found	GH11J100684, GH11J100676, GH11J100735, GH11J100726	High	ARHGAP42	ARHGAP42	ARHGAP42	Ubiquitous expression in placenta (RPKM 4.3), thyroid (RPKM 3.5)	artery_tibial	5.702	EH38E1564290	May influence blood pressure by functioning as a GTPase-activating protein for RHOA in vascular smooth muscle. The smooth muscle-selective RhoGAP GRAF3 (ARHGAP42) is a critical regulator of vascular tone and hypertension (PMID: 24335996)	Vasculature related
44	rs57227125	11	133154619	133284724	T	C	0.022	0.004494	9.86e-07	0.2575	(iv)	not found	not found	GH11J133284	low	OPCML	OPCML	OPCML	Biased expression in brain (RPKM 9.6) and kidney (RPKM 0.2)	artery_tibial	0.04434	not found	Binds opioids in the presence of acidic lipids; probably involved in cell contact.(Open Targets)	Unlikely related
45	rs34325	12	12877692	12724757	C	T	0.01916	0.003824	5.447e-07	0.5155	(i)	APOLD1, 3.7e-27(Cells - Cultured fibroblasts)	not found	GH12J012713	High	APOLD1	APOLD1	APOLD1	Broad expression in fat (RPKM 54.0), thyroid (RPKM 52.1)	artery_tibial	71.11	EH38E1593759, EH38E1593770, EH38E1593775, EH38E1593787	APOLD1 is an endothelial cell early response protein that may play a role in regulation of endothelial cell signaling and vascular function (PMID:15102925)	Vasculature related
46	rs12827748	12	80088578	79694798	T	C	0.02107	0.004287	8.909e-07	0.6943	(i)	PAWR, 2.3e-10(Artery - Tibial)	not found	GH12J079650	Medium	No results	PAWR	PAWR	Ubiquitous expression in endometrium (RPKM 8.7), thyroid (RPKM 5.9)	artery_tibial	33.7	not found	Pro-apoptotic protein capable of selectively inducing apoptosis in cancer cells, sensitizing the cells to diverse apoptotic stimuli and causing regression of tumors in animal models. (Open Targets)	Unknown
47	rs1401982	12	89989599	89595822	A	G	0.0395	0.003925	8.07e-24	0.6184	(i)(iv)	2.3e-7(Artery - Tibial)	not found	GH12J089645, GH12J089631, GH12J089574	High	ATP2B1	ATP2B1	ATP2B1	Ubiquitous expression in brain (RPKM 34.3), bone marrow (RPKM 16.4)	artery_tibial	12.76	EH38E1631014	Plays a role in blood pressure regulation through regulation of intracellular calcium concentration and nitric oxide production leading to regulation of vascular smooth muscle cells vasoconstriction (PMID: 22311909) The common single-nucleotide polymorphism rs2681472 (r2 = 0.941 with rs1401982 in JPT, r2 =1 with rs17249754 in CEU) is associated with early-onset preeclampsia in Northern Han Chines…	Vasculature related
48	rs79105258	12	111718231	111280427	C	A	0.06463	0.004732	1.798e-42	0.75	(iv)	not found	not found	not found	not applied	CUX2, ALDH2	CUX2	CUX2	Biased expression in prostate (RPKM 4.9), liver (RPKM 4.6)	artery_aorta	0.03596	not found	CUX2 is a ranscription factor involved in the control of neuronal proliferation and differentiation in the brain.(Open Targets). Association of CUX2-ALDH2 loci with BP is East Asian specific, and alcohol tolerance, intake and metabolic regulation may be involved (PMID:28887369, 21572416, 31089300)	Unknown
49	rs7398136	12	111751127	111313323	C	T	0.02984	0.004617	1.026e-10	0.2947	(i)	TMEM116, 2.3e-8(Artery - Tibial)	not found	not found	not applied	CUX2	CUX2	TMEM116	Broad expression in testis (RPKM 7.8), kidney (RPKM 3.9)	artery_tibial	5.065	not found	transmembrane protein 116, unchracterized	Unknown
50	rs28403936	12	111783020	111345216	A	G	0.02714	0.005278	2.716e-07	0.2098	(iv)	not found	not found	not found	not applied	CUX2	CUX2	CUX2	Biased expression in prostate (RPKM 4.9), liver (RPKM 4.6)	artery_aorta	0.03596	not found	CUX2 is a ranscription factor involved in the control of neuronal proliferation and differentiation in the brain.(Open Targets). Association of CUX2-ALDH2 loci with BP is East Asian specific, and alcohol tolerance, intake and metabolic regulation may be involved (PMID:28887369, 21572416, 31089300)	Unknown
51	rs11066232	12	112719166	112281362	C	T	0.02814	0.003946	1.006e-12	0.3646	(i)(iii)(iv)	HECTD4, 4.2e-10(Adipose - Subcutaneous)	not found	GH12J112321, GH12J112302	High	HECTD4	HECTD4	HECTD4	Ubiquitous expression in brain (RPKM 8.7), bone marrow (RPKM 7.2)	artery_aorta	17.77	EH38E1645046	E3 ubiquitin-protein ligase which accepts ubiquitin from an E2 ubiquitin-conjugating enzyme in the form of a thioester and then directly transfers the ubiquitin to targeted substrates. (Open Targets)	Unknown
52	rs232935	12	113115628	112677823	T	C	0.02624	0.004079	1.253e-10	0.4453	(iv)	not found	not found	not found	not applied	RPH3A	RPH3A	RPH3A	Biased expression in brain (RPKM 30.1) and adrenal (RPKM 1.7)	artery_coronary	0.02918	not found	Plays an essential role in docking and fusion steps of regulated exocytosis (By similarity). (Open Targets)	Unlikely related
53	rs1859337	12	113319041	112881236	T	C	0.02501	0.003895	1.362e-10	0.6158	(i)(iv)	5.0e-98(Whole Blood)	not found	not found	not applied	RPH3A	RPH3A	RPH3A		artery_coronary	0.02918	not found		Unlikely related
54	rs2701623	12	113522774	113084969	T	C	0.02821	0.004438	2.062e-10	0.7628	(iv)	not found	not found	not found	not applied	DTX1	DTX1	DTX1	Broad expression in lymph node (RPKM 13.1), spleen (RPKM 9.7)	artery_coronary	3.365	not found	Functions as a ubiquitin ligase protein in vivo, mediating ubiquitination and promoting degradation of MEKK1, suggesting that it may regulate the Notch pathway via some ubiquitin ligase activity (By similarity).(Open Targets)	Unlikely related
55	rs35504	12	115504071	115066266	G	A	0.02505	0.004301	5.747e-09	0.7345	(iv)	not found	not found	not found	not applied	LOC102723639	TBX3	intergenic	No results	not applied	not applied	not applied	Unknown	Unlikely related
56	rs35443	12	115552878	115115073	G	C	0.03405	0.004349	4.928e-15	0.7453	(iv)	not found	not found	not found	not applied	TBX3	TBX3	TBX3	Biased expression in adrenal (RPKM 89.8), prostate (RPKM 51.1)	artery_coronary	5.739	not found	TBX3 is a transcriptional repressor involved in developmental processes. Probably plays a role in limb pattern formation. Acts as a negative regulator of PML function in cellular senescence.(Open Targets)	Unlikely related
57	rs117239421	12	133117229	132540643	A	G	0.03313	0.006382	2.091e-07	0.111	(iii)(iv)	not found	not found	GH12J132487, GH12J132497, GH12J132510, GH12J132520	High	FBRSL1	FBRSL1	FBRSL1	Ubiquitous expression in spleen (RPKM 3.9), testis (RPKM 3.8)	artery_tibial	25.55	EH38E1657627	May play a role in craniofacial development and neurite outgrowth (PMID: 32424618)	Unlikely related
58	rs57850142	13	31045391	30471254	G	A	0.04326	0.008449	3.054e-07	0.9348	(iii)(iv)	not found	not found	GH13J030462	High	HMGB1	HMGB1	HMGB1	Ubiquitous expression in bone marrow (RPKM 98.7), lymph node (RPKM 87.4)	artery_tibial	108.9	EH38E1664551	Multifunctional redox sensitive protein with various roles in different cellular compartments. In the nucleus is one of the major chromatin-associated non-histone proteins and acts as a DNA chaperone involved in replication, transcription, chromatin remodeling, V(D)J recombination, DNA repair and genome stability. involved in the pathogenesis of several vascular diseases such as systemic vasculit…	Vasculature related
59	rs1078967	15	74222987	73930646	T	C	0.02644	0.00526	5.015e-07	0.1517	(i)(iii)(iv)	LOXL1, 8.3e-37(Cells - Cultured fibroblasts)	not found	GH15J073921	High	LOXL1	LOXL1	LOXL1	Broad expression in heart (RPKM 6.9), prostate (RPKM 6.7) a	artery_aorta	147.4	EH38E1777145	Active on elastin and collagen substrates. LOXL1 cross-link tropoelastin monomers into elastin polymers during formation and maintenance of elastic fibers. Elastotic and biomechanical tissue alteration due to dysregulated LOXL1 may be a predisposing factor for cardiovascular complications including aortic aneurysms.(PMID: 28534485)	Vasculature related
60	rs1451538	15	85464630	84921399	C	T	0.04382	0.007887	2.76e-08	0.9347	(iii)(iv)	not found	not found	GH15J084910	High	SLC28A1	SLC28A1	SLC28A1	Biased expression in kidney (RPKM 9.5), small intestine (RPKM 9.4)	artery_aorta	0.7497	not found	Sodium-dependent and pyrimidine-selective transporter (PubMed:21998139). It may be involved in the intestinal absorption and renal handling of pyrimidine nucleoside analogs such as AZT.(Open Targets)	Unlikely related (may function mainly in intestine and kidney)
61	rs17514846	15	91416550	90873320	A	C	0.02987	0.005398	3.148e-08	0.1441	(i)(iii)(iv)	FES, 8.5e-44 (Cells - Cultured fibroblasts);FURIN, 4.6e-6 (Artery-Tibial)	not found	GH15J090867, GH15J090862	High	FURIN	FURIN	FURIN	Ubiquitous expression in salivary gland (RPKM 50.5), liver (RPKM 36.0)	artery_aorta	432	EH38E1787879 (placenta)	FURIN levels in vascular endothelial cells affect monocyte transendothelial migration (PMID: 32067586)	Vasculature related
62	rs6504441	17	64529642	66533524	T	C	0.01979	0.003863	3.035e-07	0.3992	(iii)(iv)	not found	not found	GH17J066532	High	PRKCA	PRKCA	PRKCA	Ubiquitous expression in brain (RPKM 12.7), adrenal (RPKM 6.5)	artery_tibial	7.918	EH38E1879781	Calcium-activated, phospholipid- and diacylglycerol (DAG)-dependent serine/threonine-protein kinase that is involved in positive and negative regulation of cell proliferation, apoptosis, differentiation, migration and adhesion, tumorigenesis, cardiac hypertrophy, angiogenesis, platelet function and inflammation.(Open Targets)	Unknown
63	rs8098380	18	721563	721563	A	C	0.02591	0.003938	4.755e-11	0.5576	(i)(iii)(iv)	ENOSF1(rs2741187)6.6e-54(Muscle - Skeletal)	not found	GH18J000708	High	YES1	YES1	ENOSF1	Ubiquitous expression in bone marrow (RPKM 9.5), kidney (RPKM 9.5)	artery_aorta	16.36	EH38E1894687	Plays a role in the catabolism of L-fucose, a sugar that is part of the carbohydrates that are attached to cellular glycoproteins. (Open Targets)	Unknown
64	rs12459507	19	2224387	2224388	C	A	0.02193	0.00427	2.826e-07	0.2704	(i)(iii)(iv)	AP3D1, 7.5e-8(Artery - Tibial); PLEKHJ1, 3.9e-6(Artery - Tibial); DOT1L, 4.8e-5(Artery - Tibial)	not found	GH19J002230, GH19J002175, GH19J002234	High	DOT1L	DOT1L	DOT1L	Broad expression in testis (RPKM 18.3), bone marrow (RPKM 5.1)	artery_coronary	11.36	EH38E1932073, (EH38E1932136)	Histone methyltransferase. Methylates 'Lys-79' of histone H3. Nucleosomes are preferred as substrate compared to free histones (PMID:12123582). (Open Targets)DOT1L cooperates with transcription factor ETS-1 to stimulate the expression of VEGFR2, thereby activating ERK1/2 and AKT signaling pathways and promoting angiogenesis. (PMID:27626484)	Vasculature related
65	rs11672862	19	19262300	19151491	T	C	0.02259	0.004193	7.164e-08	0.3416	(iii)(iv)	not found	not found	GH19J019160	High	MEF2B	BORCS8-MEF2B,MEF2B	MEF2B	Broad expression in lymph node (RPKM 18.6), appendix (RPKM 7.2)	artery_aorta	11.17		Transcriptional activator which binds specifically to the MEF2 element, 5'-YTA[AT](4)TAR-3', found in numerous muscle-specific genes. May be involved in muscle-specific and/or growth factor-related transcription.(Open Targets)	Unlikely related
66	rs6031431	20	42795152	44166512	G	A	0.02443	0.004103	2.612e-09	0.3168	(i)(iii)(iv)	JPH2, 6.1e-17(Cells - Cultured fibroblasts)	not found	GH20J044169, GH20J044165	High	JPH2	JPH2	JPH2	Biased expression in heart (RPKM 14.9), prostate (RPKM 9.1)	artery_tibial	97.35		Membrane-binding protein that provides a structural bridge between the plasma membrane and the sarcoplasmic reticulum and is required for normal excitation-contraction coupling in cardiomyocytes (PMID:20095964).	Unlikely related (may function mainly in cardiomyocyte)
67	rs5762861	22	29250505	28856744	G	T	0.01878	0.003832	9.596e-07	0.5734	(i)(iii)(iv)	ZNRF3, 1.9e-13(Artery - Aorta)	not found	GH22J028807, GH22J028902	High	ZNRF3	ZNRF3	ZNRF3	Ubiquitous expression in kidney (RPKM 4.8), brain (RPKM 4.7)	artery_aorta	13.14	EH38E2156492 (placenta)	E3 ubiquitin-protein ligase that acts as a negative regulator of the Wnt signaling pathway by mediating the ubiquitination and subsequent degradation of Wnt receptor complex components Frizzled and LRP6. (Open Targets)	Unknown

[truncated: 3 more sheets: Table S11, Table S12, Table S13]
